# Supplementary material for: Persuasive Messages Will Not Increase COVID-19 Vaccine Acceptance: Evidence from a Nationwide Online Experiment
Source: MDPI journal article supplement (doi:10.3390/vaccines9101113), 2021-09-30
Supplement: s1 [file s1]

**Supplementary Information for**

Persuasive messages will not increase COVID-19 vaccine acceptance: Evidence from a nationwide online experiment

Raman Kachurka, Michał Krawczyk\*, Joanna Rachubik  
Faculty of Economic Sciences, University of Warsaw, Warsaw, Poland.  
**Email:** mkrawczyk@wne.uw.edu.pl

**This file includes:**

- Supplementary S1– Questionnaire (both waves)
- Supplementary S2 – Overview: categorization of open-ended questions
- Supplementary S3 – Procedure: categorization of open-ended questions
- Supplementary S4 – Detailed results: categorization of open-ended questions
- Supplementary S5 – Additional tables for Wave 1
- Supplementary S6 – Additional tables for Wave 2
- Supplementary S7 – Summary of demographic characteristics, Wave 1 and Wave 2
- Figures S1.1 to S3.2
- Tables – Table S1.1 to Table S5.1

## Supplementary S1– Questionnaire (both waves)

[text in square brackets was not visible to the subjects]

We invite you to fill in the questionnaire as part of the research conducted for the University of Warsaw. Please answer according to your beliefs. We guarantee full confidentiality of the collected data.

The survey will take you about 15 minutes to complete, and you will receive [xx] Ariadna points for it.

The survey consists of several different thematic blocks. Please complete the survey at once and do not take breaks. While completing the survey, it is not possible to return to the previous page.

To participate in the survey, please continue.

Greetings

In case of any problems with the survey, or if you would like to provide us with your comments on the survey, please contact us:

---

**[sex] What is your gender?**

[rotate]  
female  
male

---

**[age] What age are you?**

18-24 years old  
25-34 years old  
35-44 years old  
45-54 years old  
55 years old or older

**[year] What year were you born?**

[ ]

---

**[city\_population] What is the size of the community you live in?**

village  
small town (up to 20 000 inhabitants)  
medium city (between 20 000 and 99 000 inhabitants)  
large city (between 100 000 and 500 000 inhabitants)  
large city (more than 500 000 inhabitants)

---

**[woj] What voivodeship do you live in?**

Dolnośląskie  
Kujawsko-Pomorskie  
Lubelskie  
Lubuskie  
Łódzkie  
Małopolskie  
Mazowieckie  
Opolskie  
Podkarpackie  
Podlaskie  
Pomorskie  
Śląskie  
Świętokrzyskie

Warmińsko-Mazurskie  
Wielkopolskie  
Zachodniopomorskie

---

**[edu] What is your current education (the last school completed)?**

Primary or lower secondary school  
elementary  
secondary  
post-secondary  
currently studying  
bachelor's degree  
higher education completed

---

[if in edu: bachelor or higher education]

**[M7] What was your field of study?**

---

[in if edu: currently studying]

**[M7a] What is your field of study?**

---

**[P17] How strongly are you experiencing the following emotion at the moment?**

[horizontal scale: 1 I do not feel this emotion now, 10 I feel this emotion very strongly right now]

[rotate and register order]

Joy  
Fear  
Anger  
Repulsion  
Sadness  
Surprise

---

[only in wave 2]  
**[trust\_gov, trust\_neighbours, trust\_doctors, trust\_media, trust\_family, trust\_scientists] Do you trust:**

[rotate and register order]  
representatives of the European Union  
the government  
your neighbors  
doctors  
the media (journalists)  
your family  
scientists

[scale:] YES, high  
YES, moderate  
NO  
I have no opinion

---

**[P18] How do you perceive your willingness to take risks in general?**

[horizontal scale: 1 totally risk-averse, 10 totally willing to take risks]

---

**[P19] People may behave differently in different situations. How would you rate your willingness to take risks in the following cases?**

[horizontal scale: 1 totally risk-averse, 10 totally willing to take risks]

[rotate and register order]

Your professional work

Taking care of your health, such as undergoing surgery that may bring complications, putting off recommended medical tests, changing a prescribed medication without consulting your doctor, having unprotected sex with someone other than a long-term, faithful partner.

---

**[P37]** Read the description below and then answer the related questions.

A vaccine for coronavirus has recently become available in Poland. Vaccination is voluntary.

*[Randomized messages – each could be present or not. Exactly three randomly selected messages were shown in Wave 1: each message was independently drawn or not (50/50) in Wave 2]*

**[v\_producer\_reputation]**

The vaccine was developed by scientists from the American Pfizer and the German Biontech.  
[wave 1] The vaccine was developed by scientists from an international research consortium.  
[wave 2]

**[v\_efficiency]** The vaccine's effectiveness has been estimated at over 90%, which means that a vaccinated person is more than ten times less likely to get the disease than an unvaccinated person.

**[v\_safety]** The European Medicines Agency confirms that the vaccine is safe. Possible side effects are mild to moderate, can be treated with paracetamol, and disappear within a few days.

**[v\_other\_want\_it]** Research conducted by IPSOS on 18 000 people in 15 countries shows that about 75% want to get vaccinated as soon as possible.

**[v\_scientific\_authority]** According to the COVID team at the Polish Academy of Sciences, "vaccination is the only rational choice, thanks to which we will be able to exit the pandemic faster." The use of the vaccine is also recommended by the Supreme Medical Chamber and many other medical and scientific societies.

**[v\_ease\_personal\_restrictions]** It should be assumed that vaccination will make everyday life easier: vaccinated people will not have to quarantine after contact with an infected person, will be able to travel freely abroad, will not have to wear a face mask, etc.

**[v\_scarcity]** *[only in wave 1]* In the initial stages, there will not be enough vaccines for everyone.

**[v\_tested]** *[only in wave 2]* Development work on the vaccines began immediately after the pandemic outbreak and was treated as a priority. It drew on the vast experience of the research teams involved and used some of the solutions that had been used in vaccines for years. In total, more than 100 000 people were tested in clinical trials.

*[Price information: one of four versions randomly shown:]*

**[v\_p\_pays0]** Now, suppose that the vaccine will be free for the person who wants to be vaccinated.

**[v\_p\_gets70]** Now, suppose that the vaccine will be free for a person who wants to be vaccinated, and as an incentive for mass vaccination, the government will pay everyone who wants to be vaccinated 70 zł.

**[v\_p\_pays10]** Now, suppose that the vaccine will be fee-based and will cost about 10 zł per person.

**[v\_p\_pays70]** Now assume that the vaccine will be fee-based and will cost about 70 zł per person.

If, provided the information you just read was confirmed, would you be willing to get vaccinated?

definitely not  
probably not  
probably yes  
definitely yes

[P38] Describe below the main reasons for your decision regarding coronavirus vaccination.

---

[P39] Who or what could change your decision regarding coronavirus vaccination?

---

[if previously indicated that they would probably or definitely not want to be vaccinated]

[P40] If the vaccine was confirmed to be effective and safe after the first few months of vaccinations, would you be willing to be vaccinated?

- definitely not
- probably not
- probably yes
- definitely yes

---

[P20] To what extent are you concerned or frightened with the current coronavirus pandemic?

[horizontal scale: 1 I am not concerned at all, 10 I am terrified]

---

[P21] What factors are major influences on the extent to which you are concerned about a coronavirus pandemic?

---

[P22] How would you rate your impact on whether you get infected with coronavirus?

[horizontal scale 1-7: 1 I have no influence, 7 I have a very high influence]

---

[P23] How well informed do you feel about the current coronavirus pandemic?

[horizontal scale 1-7: 1 I do not feel informed at all, 7 I feel very well informed]

---

[Rotate the order of P24 and P25 and register order]

[P24] As of January 14th [wave 1]/February 27th [wave 2] of this year, approximately 1.4 [wave 1]/1.68 [wave 2] million people in Poland were confirmed to be infected with the coronavirus.

How many NEW infections do you think will be confirmed in Poland within the next 12 months?

[. . .] mln. people

---

[P25] As of January 14th [wave 1]/February 27th [wave 2] of this year, approximately 32 [wave 1]/43 [wave 2] 000 people in Poland have died as a result of coronavirus infection.

How many people do you think will die from COVID in Poland within the next 12 months?

[. . .] thousand people

---

[mask] Do you wear a mask when walking down an uncrowded sidewalk?

- I never do
- I sometimes do
- I mostly do
- I do every time

[hands] [only wave 2] How often do you wash, disinfect your hands (compared to before the pandemic)?

- not more often than before the pandemic
- a little more often
- a lot more often

[P30] To what extent do you try to keep a physical distance from other people?

[horizontal scale 1 - 10: 1 I do not try to keep my distance at all, 10 I try as much as possible]

**[P28] Would you like to add a comment or supplement your above answer (e.g., the reason for the change in a given matter)?**

[rotate]

no

yes

[if yes]

**[P29] Your comment:**

---

Read the description below and then answer the related questions.

**[conspiracy] Certain events, such as the COVID-19 pandemic, are subject to debate. Some people suggest that the official version of these events could be an attempt to hide the truth from the public. This official version could be covering up that these events were planned and covertly prepared by a secret alliance of influential people or organizations (for example, the secret service or the government). We are interested in your opinion on this subject.**

**To what extent do you agree or disagree with the following statements?**

[scale 1-7: 1 strongly disagree, 7 strongly agree]

[rotate and register order]

[r1] I think that official government information on COVID-19 is generally untrue.

[r2] I think that government statistics on COVID-19 infections and deaths are deliberately falsified.

[r3] I think that most of the recommendations related to COVID-19 have no rationale for pandemic containment and actually serve other purposes.

**[P31] Are you or have you been infected with coronavirus?**

Yes, and this was confirmed by a test

I think so

I don't think so

No

[if in P31: Yes, and this was confirmed by a test]

**[P32] Have you been hospitalized due to coronavirus infection?**

no

yes

---

**[P33] Do you personally know anyone who has been infected with coronavirus?**

no

yes

---

[if in P33: yes]

**[P34] Have any of these people been hospitalized?**

no

yes

---

We're changing the topic.

**[M8] Which of the following terms best describes your household?**

We live very poorly – we don't have enough for our basic needs

We live modestly – we have to manage economically every day

We live on average – we have enough money for everyday living, but we have to save for major purchases

We live well – we can afford much without saving  
We live very well – we can afford some luxury

**[M9] How would you rate your overall health?**

very bad  
bad  
average  
good  
very good

**[M9\_1]** [only wave 2] To your knowledge, does your health and medical history indicate a particularly high risk of side effects after receiving the COVID-19 vaccination? Such risk factors include certain chronic diseases and allergies.

Yes, I have particular risk factors  
No, I do not have any  
Don't know

**[M9\_2]** [only wave 2] To your knowledge, does your health and medical history indicate a particularly high risk of severe course of illness if infected with coronavirus? Such risk factors include, but are not limited to, certain chronic diseases, a weakened immune system, cancer, being overweight, diabetes, pregnancy, and smoking.

Yes, I have specific risk factors  
No, I do not have any  
Don't know

**[M9\_3]** [only wave 2] Do you smoke cigarettes?

yes  
no

**[M9\_3a]** If yes, how many cigarettes on average do you smoke per day?

**[M9\_3b]** If no, have you ever smoked cigarettes in your life?

yes  
no

---

**[M10] Which description fits you best?**

Not a believer  
Believer  
Believing deeply

**[M11] How often do you privately engage in religious activities, for example, prayer, Bible reading, etc.?**

Less than once a year  
Several times a year  
Several times a month  
Several times a week  
Several times a day

---

**[M12] What is your current employment status?**

I work under an employment contract  
I work under a contract of commission  
I am working on a task-specific contract  
I have my own business  
Unemployed  
Pensioner  
Pupil or student

---

**[M13] Did you participate in the Polish Parliament elections held on October 13th, 2019?**

no  
yes  
I don't remember

---

[if M13: yes]

**[M14] Which political group did you vote for in the Polish parliamentary elections that took place on October 13th, 2019?**

[rotate]  
Prawo i Sprawiedliwość + Solidarna Polska + Porozumienie  
Koalicja Obywatelska (PO + Nowoczesna + Inicjatywa Polska + Zieloni)  
SLD + Wiosna Roberta Biedronia + Lewica Razem, czyli Partia Razem, Unia Pracy, RSS  
PSL + Kukiz 15  
Konfederacja (KORWiN + Ruch Narodowy)  
other (enter which one) [do not rotate]  
I don't remember [do not rotate]

---

[everyone]

**[M15] Did you participate in the 1st round of the presidential election held on June 28th, 2020?**

[rotate]  
no  
yes  
I don't remember [do not rotate]

---

[if yes]

**[M16] Who did you vote for in the 1st round of the presidential election held on June 28th, 2020?**

[rotate]  
Andrzej Duda  
Szymon Hołownia  
Władysław Kosiniak-Kamysz  
Krzysztof Bosak  
Rafał Trzaskowski  
Robert Biedroń  
Marek Jakubiak  
Paweł Tanajno  
Stanisław Żółtek  
Mirosław Piotrowski  
Waldemar Witkowski  
I don't remember [do not rotate]

---

[everyone]

**[M17] Did you participate in the 2nd round of the presidential election on July 12th, 2020?**

[rotate]  
no  
yes  
I don't remember [do not rotate]

---

[if participated in the 2nd round]

**[M18] Who did you vote for in the 2nd round of the presidential election held on July 12th, 2020?**

[rotate]  
Andrzej Duda



Rafał Trzaskowski  
I don't remember [do not rotate]

---

[everyone]

**[M19] Would you participate in Polish parliamentary elections if they were held this Sunday and participation in them was safe from the perspective of epidemic risk?**

definitely not  
probably not  
probably yes  
definitely yes  
hard to say

---

[if rather or definitely yes]

**[M20] For which political group would you vote if the elections to the Polish parliament were held this Sunday?**

[rotate]

Prawo i Sprawiedliwość + Solidarna Polska + Porozumienie  
Koalicja Obywatelska (PO + Nowoczesna + Inicjatywa Polska + Zieloni)  
Polska 2050 Szymona Hołowni  
SLD + Wiosna Roberta Biedronia + Lewica Razem, czyli Partia Razem, Unia Pracy, RSS  
PSL - Koalicja Polska  
Kukiz'15  
Konfederacja (KORWiN + Ruch Narodowy)  
other (enter which one) [do not rotate]  
hard to say [do not rotate]

---

Official and reliable information about the new coronavirus SARS-Cov-2 causing COVID-19 disease can be found, among others, at the following sites in Polish:

[www.gov.pl/web/koronawirus](http://www.gov.pl/web/koronawirus), [www.pacjent.gov.pl/koronawirusinformacje](http://www.pacjent.gov.pl/koronawirusinformacje),  
[www.gis.gov.pl/kategoria/aktualnosci](http://www.gis.gov.pl/kategoria/aktualnosci), [www.nfz.gov.pl](http://www.nfz.gov.pl)  
and English: <https://www.who.int/health-topics/coronavirus>.

[standard end page with acknowledgments, etc.]

### **Supplementary S2– Overview: categorization of open-ended questions**

We seek further insight into respondents' decisions by analyzing their answers to our open-ended question – “why will you/will you not get vaccinated” and “who or what might change your mind?”; see Supplementary S3 for details of the classification procedure and Supplementary S4 for tables with the prevalence of each response category.

Overall, the most common concern is that of vaccine safety (32% of responses fit into this category), possibly because they have been insufficiently tested (15.9% of responses). It can also be noted that vaccine safety concerns only *grew* from Wave 1 to Wave 2, possibly because of the media reports of the cases of blood clotting disorder in AstraZeneca vaccine patients and consequent decisions of some governments to suspend administration. Such news was indeed most numerous immediately prior to and during Wave 2.

There are also sizable groups just saying no (15.7%) or reporting mistrust towards those producing, distributing, or recommending COVID-19 vaccines (11.5%). The fraction of choice justifications relating to conspiracy theories was relatively low overall (5.4%), even though, when asked explicitly, as many as an approximate 40 percent strongly agree (6 or 7 on a 0-7 scale) that official government information on COVID-19 is generally untrue, that government statistics on COVID-19 infections and deaths are deliberately falsified, and that most of the recommendations related to COVID-19 have no rationale for pandemic containment and actually serve other purposes. Interestingly (though perhaps unsurprisingly), those responses categorized as manifestations of conspiracy theories were nearly four times more prevalent among those saying “definitely not” than those saying they would “probably not” be vaccinated. Likewise, the fraction of those saying they oppose vaccines, in general, was very low (2.2%).

Given the concern about side effects, it is not surprising that among those opposing COVID-19 vaccines, the most common “constructive” responses to the question who or what could change their mind are those mentioning more evidence of safety (6.4%) or more information in general (5.8%) (for more details, see Table S2.2 in Supplementary S4). However, these figures are dwarfed by the prevalence of those unwilling to change one’s opinion no matter what (51.7%). Unsurprisingly, this statement was much more common among those who will “definitely” not get vaccinated. Relatedly, when asked if they could change their opinion if the early phase of the vaccination campaign confirmed that the COVID vaccines are safe and effective, as much as 86% of vaccine-opposing respondents said no. Selected significant effects are illustrated in Figure S1.1.

Among respondents willing to get vaccinated, (for more information, see Table S2.3 in Supplementary S4), safety was also of paramount importance, but, obviously, they predominantly claimed that the vaccines will provide protection from the virus for themselves (65%) and/or their loved ones (16.7%). Other popular reasons were convenience of travel and similar concerns (12.3%) and a somewhat diffuse “return to normality” (8.2%). Not surprisingly, those concerned about safety, when asked what could change their mind (Table S2.4 in Supplementary S4), were relatively likely to mention vaccines side effects (these variables correlate at  $r = .21$ ) but, again, overall prevalence even of this most common specific category (22.3%) was much lower than that of the “no-one”/“nothing” kind of responses (44.0%). Selected significant effects are illustrated in Figure S1.2.

### **Supplementary S3– Procedure: categorization of open-ended questions**

The open-ended questions were categorized using the following procedure. Firstly, a number of categories were proposed based on the existing literature and a manual inspection of a sample from the first wave. Initially, the two raters manually categorized the responses of 200 randomly selected subjects, see Table S1.1.

Thus, according to (1), all but one of our kappas could be considered “almost perfect”. Subsequently, the process of assigning the responses to categories was partly automatized for the sake of efficiency and objectivity. Specifically, a number of keywords was proposed for each category for the question concerning the main reasons behind the decision (“why?”) and the question as to who or what could change the respondent's decision (“who?”), see Supplementary S4. Whenever a keyword was found in the response, we initially assigned the response to the relevant category, allowing a response to belong to multiple categories. For example: category

*conspiracy* was associated with words (and its inflections) “lie, made up, no pandemics, no COVID, Gates, nonsense”. If an algorithm found any of these words (or combinations of words), it classified such responses to the *conspiracy* category. The exact script is available at <https://github.com/becarefulwithmath/COVID-classification-of-open-ended-questions>. In such a way, our script classified answers to “why?” and “who?”. It assigned a preliminary category to 3 716 answers to “why?” question; and to 4 784 answers to “who?” question.

This preliminary categorization was manually inspected by two independent raters and corrections were made if both raters sought them. This was the case for 2 652 initially categorized responses to “why?” and 1 814 of initially categorized responses to “who?” (but many of these changes involved correcting only one of the several categories identified automatically). Moreover, the two raters manually categorized the responses that were not assigned to any category (2 507 of responses to “why?” and 1 439 of responses to “who?”). Again, a response was assigned to a category if both raters agreed.

#### **Supplementary S4– Detailed results: categorization of open-ended questions**

This section contains detailed results of the categorization of open questions, meaning Table S2.1, Table S2.2, Table S2.3, and Table S2.4.

#### **Supplementary S5– Additional tables for Wave 1**

This section contains additional tables with regression results for Wave 1, in particular Table S3.1, Table S3.2, Table S3.3, and Table S3.4.

#### **Supplementary S6– Additional tables for Wave 2**

This section contains additional tables with regression results for Wave 2, in particular Table S4.1, Table S4.2, Table S4.3, and Table S4.4.

#### **Supplementary S7– Summary of demographic characteristics, Wave 1 and Wave 2**

This section contains a summary of demographic characteristics for Wave 1 and Wave 2 - Table S5.1

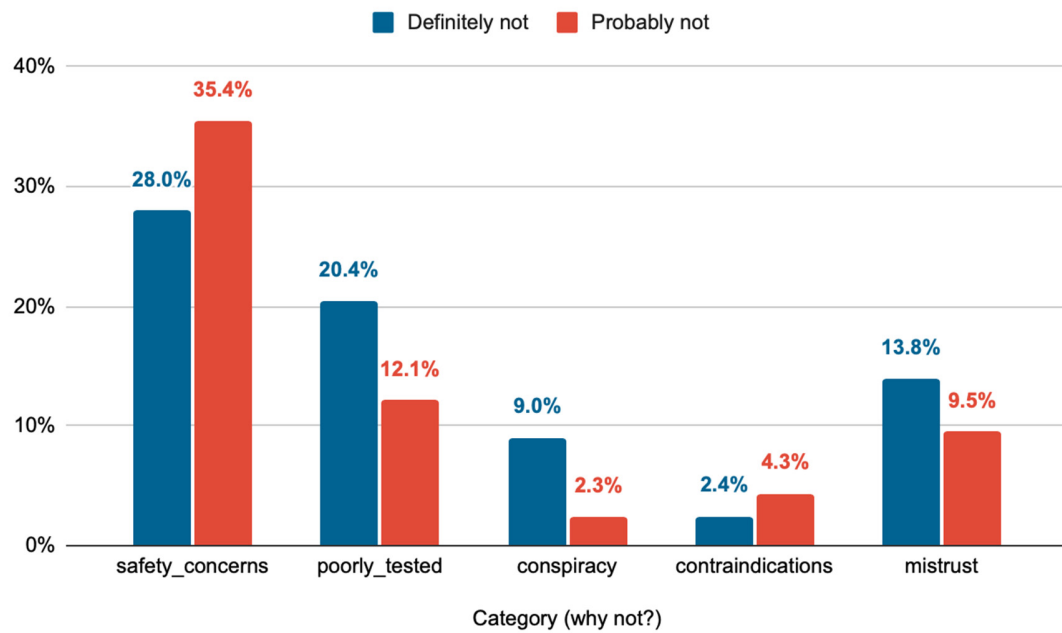

Figure S1.1: Prevalence of the response to the Why question belonging to different categories (definitely not and probably not); weighted average from both waves

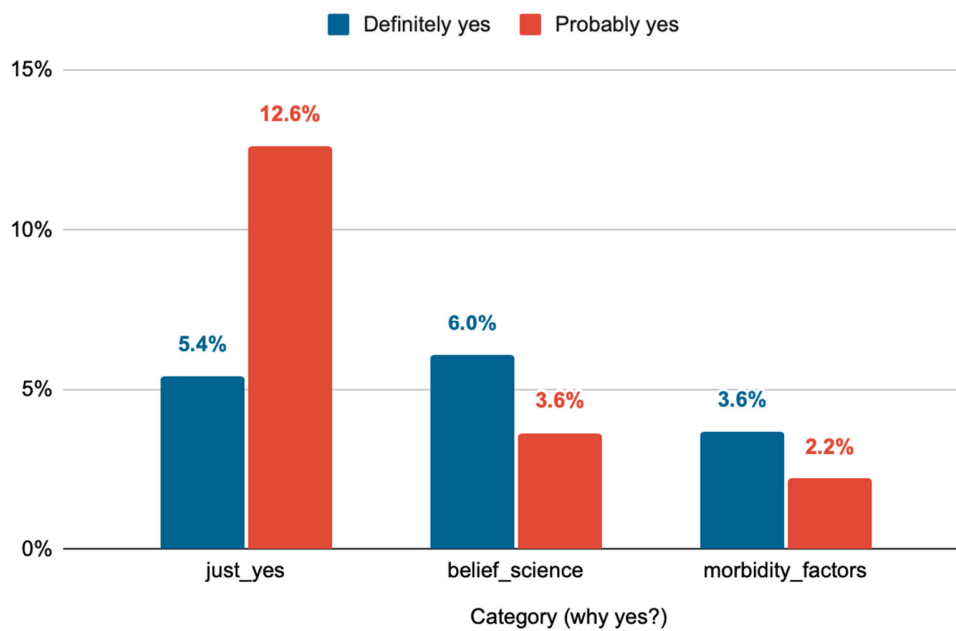

Figure S1.2: Prevalence of the response to the Why question belonging to different categories (definitely yes and probably yes); weighted average from both waves

Table S1.1 - interrater agreement (kappa statistics) for the manual classification of open-ended questions

| Variable                           | Interrater agreement |
|------------------------------------|----------------------|
| <i>related to question "why?":</i> |                      |
| safety_general                     | 0.98                 |
| safety_concerns                    | 0.98                 |
| belief_science                     | 0.94                 |
| doubts_no                          | 0.83                 |
| others_safety                      | 0.97                 |
| not_afraid_virus                   | 0.94                 |
| poorly_tested                      | 0.96                 |
| contraindications                  | 1.00                 |
| antibodies                         | 1.00                 |
| convenience                        | 0.89                 |
| normality                          | 0.83                 |
| just_no                            | 1.00                 |
| no_alternatives                    | 1.00                 |
| just_yes                           | 0.92                 |
| conspiracy                         | 1.00                 |
| efficacy_concerns                  | 1.00                 |
| morbidity_factors                  | 1.00                 |
| vaccine_too_costly                 | 1.00                 |
| side_effects                       | 0.94                 |
| <i>related to question "who?":</i> |                      |
| nothing                            | 1.00                 |
| doctor                             | 1.00                 |
| dont_know                          | 1.00                 |
| more_evidence_inefficacy           | 1.00                 |
| else                               | 1.00                 |
| forced                             | 1.00                 |
| more_evidence_efficacy             | 0.76                 |
| more_evidence_safety               | 1.00                 |
| money                              | 1.00                 |

|         |      |
|---------|------|
| time    | 0.85 |
| family  | 0.94 |
| average | 0.96 |

Two reviewers, n=200

Table S2.1: Categorized answers to: "Why will you not get vaccinated?"

| Why will you not get vaccinated? |                                                                                                  | Will you get vaccinated? |            |              |            | Average (weighted by N) |
|----------------------------------|--------------------------------------------------------------------------------------------------|--------------------------|------------|--------------|------------|-------------------------|
|                                  |                                                                                                  | definitely not           |            | probably not |            |                         |
| Classified as:                   | Examples:                                                                                        | wave 1                   | wave 2     | wave 1       | wave 2     |                         |
| safety_concerns                  | Vaccine unsafe; afraid of complications/of side effects; it's risky; afraid for my health/life   | 26.4%                    | 29.9%      | 31.1%        | 40.6%      | 32.0%                   |
| efficacy_concerns                | Vaccine ineffective; I don't know if it will work                                                | 5.6%                     | 5.7%       | 5.1%         | 7.8%       | 6.0%                    |
| poorly_tested                    | Poorly tested; lack of accountability by pharmaceutical companies; I will not be a guinea pig    | 21.4%                    | 19.4%      | 10.5%        | 13.9%      | 15.9%                   |
| not_afraid_virus                 | Virus is not dangerous; I am strong; I don't get sick; I have a high immunity; I am young        | 10.0%                    | 10.6%      | 8.2%         | 7.0%       | 8.9%                    |
| just_no                          | Just no; I don't want to                                                                         | 18.0%                    | 10.6%      | 22.2%        | 9.7%       | 15.7%                   |
| vaccine_too_costly               | Vaccine is too costly; I don't have that much money                                              | 4.6%                     | 5.8%       | 5.9%         | 5.0%       | 5.4%                    |
| conspiracy                       | Something about conspiracy theories: Gates; 5G; I don't believe in pandemics/COVID/fairy tales   | 7.9%                     | 10.3%      | 1.6%         | 3.2%       | 5.4%                    |
| contraindications                | I have medical contraindications (chronic diseases, allergies, sensitivities, chemotherapy)      | 2.8%                     | 2.0%       | 5.0%         | 3.5%       | 3.4%                    |
| antibodies                       | I've already been through this; I have antibodies                                                | 0.5%                     | 1.6%       | 0.5%         | 2.4%       | 1.2%                    |
| doubts_no                        | I have doubts; I don't know what to think about COVID vaccines; I have many unanswered questions | 0.9%                     | 0.9%       | 2.3%         | 2.4%       | 1.7%                    |
| mistrust_no                      | I don't trust vaccines/pharmaceutical companies/the government/the media                         | 12.9%                    | 15.0%      | 7.2%         | 12.2%      | 11.5%                   |
| antivax                          | I do not vaccinate; I am against vaccines; vaccines are evil; vaccination is stupid              | 2.0%                     | 2.6%       | 2.9%         | 2.2%       | 2.4%                    |
|                                  | <b>N</b>                                                                                         | <b>632</b>               | <b>529</b> | <b>745</b>   | <b>628</b> | <b>2534</b>             |

Note: The numbers in Tables 6-9 may add up to more than 100% because some responses belong to more than one category



Table S2.2: Categorized answers to: "Who or what might change your mind?"

|                                     |                                                                                                             | Will you get vaccinated? |        |              |        |                         |
|-------------------------------------|-------------------------------------------------------------------------------------------------------------|--------------------------|--------|--------------|--------|-------------------------|
| Who or what might change your mind? |                                                                                                             | definitely not           |        | probably not |        | Average (weighted by N) |
| Classified as:                      | Examples:                                                                                                   | wave 1                   | wave 2 | wave 1       | wave 2 |                         |
| dont_know                           | I don't know                                                                                                | 8.0%                     | 4.7%   | 23.2%        | 13.9%  | 13.2%                   |
| nothing                             | No one; nothing; extreme (impossible) amounts of money; only me                                             | 63.7%                    | 71.1%  | 35.3%        | 42.8%  | 51.7%                   |
| family                              | Close relationships, relatives, family; their health state; if they ended up in hospital                    | 1.6%                     | 2.1%   | 3.1%         | 4.8%   | 2.9%                    |
| doctor                              | Doctor                                                                                                      | 1.1%                     | 0.4%   | 2.1%         | 2.8%   | 1.7%                    |
| else                                | Some other person/persons mentioned                                                                         | 0.9%                     | 1.5%   | 2.0%         | 1.6%   | 1.5%                    |
| more_info                           | More information about the vaccine; more facts; more studies about the vaccine; better testing of a vaccine | 4.1%                     | 3.1%   | 6.6%         | 8.9%   | 5.8%                    |
| forced                              | Force; compulsion; punishment by imprisonment                                                               | 3.5%                     | 1.4%   | 3.1%         | 3.1%   | 2.8%                    |
| money                               | Money will convince me; if the vaccine is free; it depends on the price                                     | 2.8%                     | 3.5%   | 2.6%         | 2.5%   | 2.8%                    |
| more_evidence_efficiency            | More evidence of effectiveness                                                                              | 1.8%                     | 1.5%   | 3.6%         | 3.7%   | 2.7%                    |
| more_evidence_safety                | More evidence of safety                                                                                     | 4.1%                     | 4.6%   | 7.8%         | 8.5%   | 6.4%                    |
| time                                | I just might decide differently someday; time; years of testing; positive vaccination statistics            | 4.2%                     | 4.0%   | 6.6%         | 4.0%   | 4.8%                    |
|                                     | <b>N</b>                                                                                                    | 632                      | 529    | 745          | 628    | 2534                    |

Table S2.3: Categorized answers to: "Why will you get vaccinated?"

|                              |                                                                                                         | Will you get vaccinated? |            |              |            |                         |
|------------------------------|---------------------------------------------------------------------------------------------------------|--------------------------|------------|--------------|------------|-------------------------|
| Why will you get vaccinated? |                                                                                                         | definitely yes           |            | probably yes |            | Average (weighted by N) |
| Classified as:               | Examples:                                                                                               | wave 1                   | wave 2     | wave 1       | wave 2     |                         |
| safety_general               | Less risk; safety; security; more calm; peace of mind; for my own safety; covid is dangerous            | 60.0%                    | 69.3%      | 47.3%        | 61.1%      | 65.0%                   |
| others_safety                | For the safety of loved ones; for the safety of others                                                  | 16.0%                    | 18.8%      | 12.5%        | 14.8%      | 16.7%                   |
| normality                    | A return to normality; I want the pandemic to end; I want this situation to end                         | 7.4%                     | 9.6%       | 4.8%         | 6.9%       | 8.2%                    |
| just_yes                     | Because yes; more pros than cons; it's worth it                                                         | 7.4%                     | 3.1%       | 16.6%        | 8.7%       | 6.0%                    |
| belief_science               | Because I believe in science; trust scientists                                                          | 6.0%                     | 6.1%       | 3.6%         | 3.7%       | 4.9%                    |
| no_alternatives              | Because there are no alternatives; it is the only option                                                | 1.9%                     | 1.7%       | 1.8%         | 0.9%       | 1.3%                    |
| morbidity_factors            | Individual medical reasons for COVID to be risky (cancer, overweight, diabetes, pregnancy, I'm at risk) | 4.9%                     | 2.3%       | 2.6%         | 1.8%       | 2.0%                    |
| convenience                  | To travel; to have more privileges than those not vaccinated                                            | 10.6%                    | 12.7%      | 11.1%        | 11.9%      | 12.3%                   |
| doubts_yes                   | I have doubts; I don't know what to think about COVID vaccines; I have many unanswered questions        | 0.0%                     | 0.2%       | 2.7%         | 2.8%       | 1.5%                    |
| money                        | I don't want to pay; it should be free; I want to make money; I will get vaccinated but for free        | 0.8%                     | 0.2%       | 0.7%         | 1.2%       | 0.7%                    |
| already_vac                  | Already vaccinated                                                                                      | 1.0%                     | 2.6%       | 0.1%         | 0.3%       | 1.4%                    |
| obligation                   | It is necessary; it should be done                                                                      | 1.7%                     | 1.5%       | 0.9%         | 1.7%       | 1.6%                    |
|                              | <b>N</b>                                                                                                | <b>884</b>               | <b>797</b> | <b>844</b>   | <b>860</b> | <b>3385</b>             |

Table S2.4: Categorized answers to: “Who or what might change your mind?”

|                                     |                                                                                     | Will you get vaccinated? |            |              |            |                         |
|-------------------------------------|-------------------------------------------------------------------------------------|--------------------------|------------|--------------|------------|-------------------------|
| Who or what might change your mind? |                                                                                     | definitely yes           |            | probably yes |            | Average (weighted by N) |
| Classified as:                      | Examples:                                                                           | Wave 1                   | Wave 2     | Wave 1       | Wave 2     |                         |
| dont_know                           | I don't know                                                                        | 8.2%                     | 5.1%       | 17.4%        | 14.6%      | 11.4%                   |
| nothing                             | No one; nothing; only me                                                            | 56.0%                    | 54.4%      | 36.2%        | 29.7%      | 44.0%                   |
| family                              | The loved ones, relatives, family; their health state; if they ended up in hospital | 2.1%                     | 1.4%       | 3.3%         | 7.5%       | 3.6%                    |
| doctor                              | Doctor                                                                              | 3.1%                     | 4.4%       | 1.7%         | 2.6%       | 2.9%                    |
| else                                | Some other person/persons mentioned                                                 | 1.0%                     | 1.3%       | 1.4%         | 1.3%       | 1.2%                    |
| more_info                           | New facts about the vaccine                                                         | 3.7%                     | 1.5%       | 3.2%         | 2.2%       | 2.7%                    |
| own_health                          | Illness; poor health; contraindications                                             | 1.5%                     | 1.3%       | 1.0%         | 1.8%       | 1.4%                    |
| more_evidence_inefficacy            | Evidence of ineffectiveness; negative vaccine test results                          | 6.8%                     | 8.1%       | 6.7%         | 10.4%      | 8.0%                    |
| side_effects                        | Side effects; high mortality; the vaccine will prove harmful                        | 18.5%                    | 21.9%      | 24.6%        | 24.1%      | 22.3%                   |
|                                     | <b>N</b>                                                                            | <b>884</b>               | <b>797</b> | <b>844</b>   | <b>860</b> | <b>3385</b>             |

Table S3.1: Logistic regression on vaccination decision (Wave 1), specifications 1-4

| Variable               | l_1      | l_2      | l_3      | l_4      |
|------------------------|----------|----------|----------|----------|
| v_prod_reputation      | 0.905    | 0.970    | 0.973    | 0.962    |
| v_efficiency           | 0.985    | 0.994    | 1.001    | 1.248    |
| v_safety               | 0.994    | 1.029    | 1.033    | 1.662    |
| v_other_want_it        | 0.951    | 0.998    | 1.008    | 1.684    |
| v_scientific_authority | 0.994    | 1.063    | 1.061    | 1.770    |
| v_vax_passport         | 1.171    | 1.279*   | 1.296*   | 1.957    |
| v_p_gets70             | 0.739**  | 0.800    | 0.802    | 0.417*   |
| v_p_pays10             | 0.866    | 0.829    | 0.826    | 0.944    |
| v_p_pays70             | 0.585*** | 0.542*** | 0.540*** | 0.536    |
| male                   | 1.388*** | 1.464*** | 1.661    | 2.950*   |
| age                    | 1.033*** | 1.017*** | 1.018*** | 1.028    |
| city_population        |          |          |          |          |
| small (<20k)           | 0.788*   | 0.689**  | 0.680**  | 0.714**  |
| medium (20-99k)        | 0.887    | 0.836    | 0.826    | 0.846    |
| big (100-500k)         | 1.013    | 0.834    | 0.839    | 0.841    |
| large (>500k)          | 1.310*   | 0.993    | 0.996    | 0.995    |
| secondary_edu          | 1.103    | 1.167    | 0.996    | 1.145    |
| higher_edu             | 1.763*** | 1.686*** | 1.716*   | 1.721    |
| wealth_low             | 0.782*   | 0.899    | 0.906    | 0.895    |
| wealth_high            | 1.366*** | 1.291**  | 1.292**  | 1.285**  |
| health_poor            | 0.602*** | 0.570*** | 0.572**  | 0.566*** |
| health_good            | 0.677*** | 0.784**  | 0.782**  | 0.776**  |
| tested_pos_covid       | 2.363    | 2.563    | 2.660    | 2.308    |
| thinks_had_covid       | 0.798*   | 0.976    | 0.973    | 0.944    |
| covid_hospitalized     | 0.697    | 0.721    | 0.708    | 0.763    |
| covid_friends          | 2.009*** | 1.621*** | 1.627*** | 1.641*** |
| religious              | 0.850    | 0.847    | 0.842    | 0.836    |
| religious_freq         |          |          |          |          |
| less than once a year  | 0.963    | 0.960    | 0.977    | 0.987    |
| few times a year       | 1.108    | 1.067    | 1.060    | 1.100    |
| few times a month      | 0.909    | 0.843    | 0.847    | 0.878    |
| few times a week       | 0.930    | 0.867    | 0.868    | 0.879    |
| few times a day        | 0.697*   | 0.566**  | 0.571**  | 0.586**  |
| status_unemployed      | 0.710**  | 0.792    | 0.787    | 0.781    |
| status_pension         | 1.478*** | 1.314*   | 1.315*   | 1.265    |
| status_student         | 1.896*** | 1.721**  | 1.739**  | 1.778**  |
| treatment              |          |          |          |          |
| cold                   | 0.893    | 0.948    | 0.945    | 0.930    |
| unemployment           | 0.840    | 0.865    | 0.864    | 0.845    |
| Performance            | 0.998    | 1.548    | 1.556    | 1.512    |
| voting_short           |          |          |          |          |
| Left                   |          | 1.415*   | 2.277    | 1.431*   |
| right (ruling party)   |          | 0.575*** | 0.390**  | 0.551*** |

|                                                  |    |           |              |              |
|--------------------------------------------------|----|-----------|--------------|--------------|
| ultra-right                                      |    | 0.177***  | 0.199**      | 0.174***     |
| none or other                                    |    | 0.396***  | 0.397***     | 0.387***     |
| e_happiness                                      |    | 0.993     | 0.991        | 0.992        |
| e_fear                                           |    | 1.011     | 1.012        | 1.010        |
| e_anger                                          |    | 1.001     | 1.001        | 1.003        |
| e_disgust                                        |    | 1.054*    | 1.057*       | 1.051        |
| e_sadness                                        |    | 0.941*    | 0.939**      | 0.940**      |
| e_surprise                                       |    | 1.008     | 1.006        | 1.009        |
| risk_overall                                     |    | 0.980     | 0.980        | 0.981        |
| risk_work                                        |    | 0.985     | 0.986        | 0.985        |
| risk_health                                      |    | 1.049**   | 1.049**      | 1.051**      |
| worry_covid                                      |    | 1.105***  | 1.105***     | 1.107***     |
| control_covid                                    |    | 1.120***  | 1.121***     | 1.119***     |
| informed_covid                                   |    | 1.143***  | 1.142***     | 1.144***     |
| informed_cold                                    |    | 0.900**   | 0.902**      | 0.902**      |
| informed_unempl                                  |    | 0.980     | 0.977        | 0.976        |
| conspiracy_score                                 |    | 0.696***  | 0.694***     | 0.691***     |
| subj_est_cases_In                                |    | 1.036     | 1.029        | 1.040        |
| subj_est_death_I                                 |    | 1.030     | 1.029        | 1.030        |
| mask_wearing                                     |    | 1.280***  | 1.287***     | 1.275***     |
| distancing                                       |    | 1.105***  | 1.105***     | 1.108***     |
| regional dummies                                 | NO | YES, sig. | YES, sig.    | YES, sig.    |
| infected_y_pc                                    |    | 41.546*   | 45.486*      | 58.150**     |
| deceased_y_pc                                    |    | 4.684     | 13.185       | 3.321        |
| PL_infected_yester~y                             |    | 1.000     | 1.000        | 1.000        |
| PL_deceased_yester~y                             |    | 0.997     | 0.997        | 0.997        |
| male#c.age                                       |    |           | 0.997        |              |
| interactions: political preference#education     | NO | NO        | YES, not sig | NO           |
| interactions: experimental vars#demographic vars | NO | NO        | NO           | YES, not sig |
| <hr/>                                            |    |           |              |              |
| _cons                                            |    | 0.228***  | 0.150**      | 0.147**      |
| N                                                |    | 3105      | 3105         | 3105         |
| pseudo r2                                        |    | 0.120     | 0.259        | 0.261        |
| <hr/>                                            |    |           |              |              |

legend: odds ratios reported; \* p<0.1; \*\*p<0.05; \*\*\* p<0.01

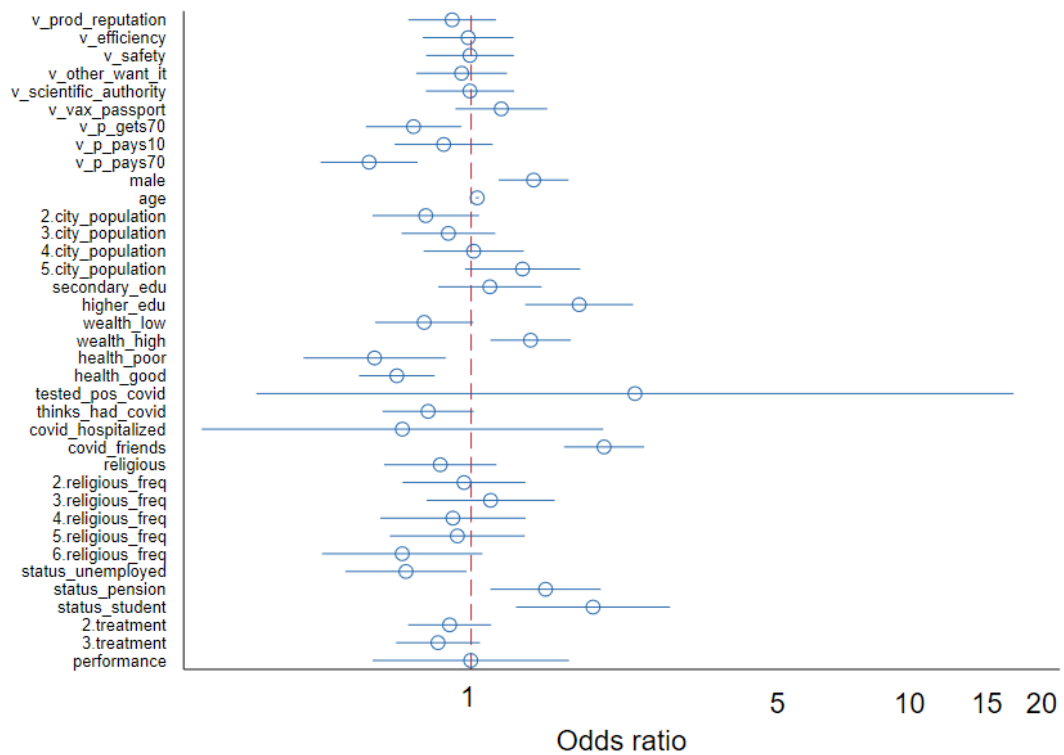

Figure S2.1: Visualization of odds ratio of logistic regression on vaccination decision (Wave 1), specification  $\_1$  with 95% CIs

Table S3.2: Logistic regression on vaccination decision (Wave 1), specifications 5-8

| Variable                    | l_5      | l_6      | l_7      | l_8      |
|-----------------------------|----------|----------|----------|----------|
| v_prod_reputation           | 0.511    | 0.956    | 0.913    | 0.958    |
| v_efficiency                | 0.593    | 0.983    | 0.815    | 0.979    |
| v_safety                    | 0.754    | 1.024    | 1.193    | 0.865    |
| v_other_want_it             | 0.624    | 0.989    | 1.413    | 1.001    |
| v_scientific_autho~y        | 0.790    | 1.064    | 1.125    | 1.054    |
| v_vax_passport              | 0.813    | 1.264*   | 1.150    | 1.284*   |
| v_p_gets70                  | 1.247    | 0.847    | 1.266    | 0.796    |
| v_p_pays10                  | 2.400    | 0.861    | 1.627    | 0.817    |
| v_p_pays70                  | 0.520    | 0.495*** | 1.126    | 0.537*** |
| male                        | 1.467*** | 1.472*** | 1.474*** | 1.468*** |
| age                         | 1.018*** | 1.017*** | 1.017*** | 1.016*** |
| city small (<20k)           | 0.704**  | 0.684**  | 0.676**  | 0.687**  |
| city medium (20-99k)        | 0.853    | 0.836    | 0.831    | 0.838    |
| city big (100-500k)         | 0.839    | 0.832    | 0.820    | 0.839    |
| city large (>500k)          | 1.010    | 0.995    | 0.988    | 1.007    |
| secondary_edu               | 1.171    | 1.190    | 1.169    | 1.155    |
| higher_edu                  | 1.669*** | 1.714*** | 1.682*** | 1.693*** |
| wealth_low                  | 0.881    | 1.045    | 0.899    | 0.890    |
| wealth_high                 | 1.268*   | 1.179    | 1.300**  | 1.289**  |
| health_poor                 | 0.548*** | 0.553*** | 0.562*** | 0.573**  |
| health_good                 | 0.769**  | 0.789**  | 0.781**  | 0.782**  |
| tested_pos_covid            | 2.928    | 2.684    | 2.528    | 2.684    |
| thinks_had_covid            | 0.993    | 0.974    | 0.977    | 0.990    |
| covid_hospitalized          | 0.685    | 0.703    | 0.725    | 0.694    |
| covid_friends               | 1.607*** | 1.624*** | 1.629*** | 1.621*** |
| Religious                   | 0.842    | 0.845    | 0.853    | 0.865    |
| relig:less than once a year | 0.948    | 0.967    | 0.953    | 0.954    |
| relig:few times a year      | 1.071    | 1.068    | 1.068    | 1.043    |
| relig:few times a month     | 0.819    | 0.849    | 0.838    | 0.832    |
| relig:few times a week      | 0.884    | 0.863    | 0.854    | 0.842    |
| relig:few times a day       | 0.567**  | 0.578**  | 0.574**  | 0.556**  |
| status_unemployed           | 0.814    | 0.814    | 0.783    | 0.802    |
| status_pension              | 1.321*   | 1.335*   | 1.310    | 1.338*   |
| status_student              | 1.770**  | 1.724**  | 1.716**  | 1.720**  |
| treatment:cold              | 0.958    | 0.939    | 0.946    | 0.950    |
| treatment:unemployment      | 0.857    | 0.849    | 0.862    | 0.855    |
| performance                 | 1.551    | 1.481    | 1.551    | 1.462    |
| voting_short                |          |          |          |          |
| left                        | 1.381    | 1.400    | 1.402    | 1.660    |
| right (ruling party)        | 0.552*** | 0.577*** | 0.570*** | 0.661    |
| ultra-right                 | 0.172*** | 0.176*** | 0.173*** | 0.281*** |
| none or other               | 0.392*** | 0.396*** | 0.394*** | 0.502*** |
| e_happiness                 | 0.991    | 0.992    | 0.993    | 0.992    |
| e_fear                      | 1.013    | 1.010    | 1.009    | 1.014    |
| e_anger                     | 0.998    | 1.003    | 1.003    | 1.001    |
| e_disgust                   | 1.051    | 1.055*   | 1.054    | 1.056*   |

|                                                                           |    |              |              |              |              |
|---------------------------------------------------------------------------|----|--------------|--------------|--------------|--------------|
| e_sadness                                                                 |    | 0.948*       | 0.943*       | 0.943*       | 0.939**      |
| e_surprise                                                                |    | 1.010        | 1.005        | 1.006        | 1.004        |
| risk_overall                                                              |    | 0.977        | 0.978        | 0.980        | 0.978        |
| risk_work                                                                 |    | 0.983        | 0.985        | 0.984        | 0.983        |
| risk_health                                                               |    | 1.051**      | 1.049**      | 1.048**      | 1.049**      |
| worry_covid                                                               |    | 1.103***     | 1.106***     | 1.107***     | 1.106***     |
| control_covid                                                             |    | 1.121***     | 1.122***     | 1.123***     | 1.116***     |
| informed_covid                                                            |    | 1.134***     | 1.142***     | 1.147***     | 1.146***     |
| informed_cold                                                             |    | 0.903**      | 0.899**      | 0.899**      | 0.902**      |
| informed_unempl                                                           |    | 0.988        | 0.983        | 0.979        | 0.983        |
| conspiracy_score                                                          |    | 0.691***     | 0.695***     | 0.782        | 0.697***     |
| subj_est_cases_In                                                         |    | 1.040        | 1.038        | 1.028        | 1.032        |
| subj_est_death_I                                                          |    | 1.031        | 1.030        | 1.030        | 1.029        |
| mask_wearing                                                              |    | 1.284***     | 1.278***     | 1.274***     | 1.287***     |
| distancing                                                                |    | 1.110***     | 1.108***     | 1.104***     | 1.105***     |
| regional dummies                                                          |    | YES,<br>sig. | YES,<br>sig. | YES,<br>sig. | YES,<br>sig. |
| infected_y_pc                                                             |    | 42.536*      | 48.076*      | 39.511*      | 37.217*      |
| deceased_y_pc                                                             |    | 5.402        | 6.368        | 22.937       | 1.376        |
| PL_infected_yester~y                                                      |    | 1.000        | 1.000        | 1.000        | 1.000        |
| PL_deceased_yester~y                                                      |    | 0.997        | 0.997        | 0.997        | 0.998        |
| interactions between<br>experimental vars                                 |    | YES,<br>n.s. | NO           | NO           | NO           |
| interaction:<br>price#wealth                                              |    | NO           | YES,<br>n.s. | NO           | NO           |
| interaction:<br>experimental<br>vars#belief                               | in | NO           | NO           | YES,<br>n.s. | NO           |
| interaction:<br>conspiracy<br>experimental vars #<br>political preference |    | NO           | NO           | NO           | YES,<br>n.s. |
| <hr/>                                                                     |    |              |              |              |              |
| _cons                                                                     |    | 0.229        | 0.147**      | 0.089*       | 0.128**      |
| <hr/>                                                                     |    |              |              |              |              |
| N                                                                         |    | 3105         | 3105         | 3105         | 3105         |
| pseudo r2                                                                 |    | 0.268        | 0.262        | 0.261        | 0.264        |
| <hr/>                                                                     |    |              |              |              |              |

legend: odds ratios reported; \* p<0.1; \*\*p<0.05; \*\*\* p<0.01



Table S3.3: Ordered logistics model (Wave 1), specifications 1-4

| Variable               | o_1      | o_2      | o_3      | o_4      |
|------------------------|----------|----------|----------|----------|
| <b>v_decision</b>      |          |          |          |          |
| v_prod_reputation      | 0.880    | 0.926    | 0.932    | 1.075    |
| v_efficiency           | 0.955    | 0.911    | 0.920    | 1.054    |
| v_safety               | 0.967    | 0.968    | 0.977    | 1.746*   |
| v_scientific_authority | 0.934    | 0.949    | 0.963    | 1.783    |
| v_scientific_autho~y   | 1.013    | 1.071    | 1.077    | 1.716    |
| v_vax_passport         | 1.103    | 1.168    | 1.181    | 1.802*   |
| v_p_gets70             | 0.806**  | 0.887    | 0.888    | 0.500*   |
| v_p_pays10             | 0.897    | 0.888    | 0.880    | 0.917    |
| v_p_pays70             | 0.629*** | 0.589*** | 0.591*** | 0.678    |
| male                   | 1.372*** | 1.428*** | 1.569*   | 2.423**  |
| city_population        |          |          |          |          |
| small (<20k)           | 1.019    | 0.928    | 0.921    | 0.962    |
| medium (20-99k)        | 0.960    | 0.941    | 0.934    | 0.955    |
| big (100-500k)         | 1.002    | 0.807    | 0.815    | 0.814    |
| large (>500k)          | 1.448*** | 1.082    | 1.087    | 1.103    |
| secondary_edu          | 1.084    | 1.094    | 0.971    | 1.084    |
| higher_edu             | 1.774*** | 1.550*** | 1.681*   | 1.193    |
| wealth_low             | 0.758**  | 0.851    | 0.853    | 0.845    |
| wealth_high            | 1.363*** | 1.311*** | 1.314*** | 1.283**  |
| health_poor            | 0.593*** | 0.567*** | 0.570*** | 0.575*** |
| health_good            | 0.668*** | 0.773*** | 0.773*** | 0.767*** |
| tested_pos_covid       | 2.365    | 4.009    | 3.982    | 3.954    |
| thinks_had_covid       | 0.825**  | 1.010    | 1.010    | 0.972    |
| covid_hospitalized     | 0.716    | 0.577    | 0.585    | 0.590    |
| covid_friends          | 1.807*** | 1.398*** | 1.401*** | 1.408*** |
| religious              | 0.849    | 0.831    | 0.835    | 0.821    |
| religious_freq         |          |          |          |          |
| less than once a year  | 0.963    | 0.978    | 0.986    | 0.994    |
| few times a year       | 1.029    | 1.028    | 1.019    | 1.044    |
| few times a month      | 0.927    | 1.014    | 1.013    | 1.045    |
| few times a week       | 0.904    | 0.900    | 0.900    | 0.910    |
| few times a day        | 0.727*   | 0.614**  | 0.614**  | 0.635**  |
| status_unemployed      | 0.759**  | 0.901    | 0.899    | 0.882    |
| status_pension         | 1.591*** | 1.316**  | 1.312**  | 1.295*   |
| status_student         | 1.898*** | 1.647**  | 1.672**  | 1.693*** |
| treatment              |          |          |          |          |
| cold                   | 0.952    | 1.032    | 1.034    | 1.011    |
| unemployment           | 0.886    | 0.922    | 0.922    | 0.900    |
| performance            | 0.875    | 1.295    | 1.289    | 1.284    |
| voting_short           |          |          |          |          |
| left                   |          | 1.480**  | 1.571    | 1.486**  |
| right (ruling party)   |          | 0.540*** | 0.464**  | 0.174*** |
| ultra-right            |          | 0.228*** | 0.282*   | 0.221*** |

|                                                  |           |           |           |           |
|--------------------------------------------------|-----------|-----------|-----------|-----------|
| none or other                                    |           | 0.408***  | 0.411***  | 0.396***  |
| e_happiness                                      |           | 0.982     | 0.982     | 0.979     |
| e_fear                                           |           | 0.996     | 0.999     | 0.993     |
| e_anger                                          |           | 1.003     | 1.002     | 1.008     |
| e_disgust                                        |           | 1.012     | 1.014     | 1.009     |
| e_sadness                                        |           | 0.974     | 0.973     | 0.970     |
| e_surprise                                       |           | 0.999     | 0.997     | 1.001     |
| risk_overall                                     |           | 0.994     | 0.992     | 1.000     |
| risk_work                                        |           | 0.986     | 0.987     | 0.985     |
| risk_health                                      |           | 1.027     | 1.026     | 1.026     |
| worry_covid                                      |           | 1.135***  | 1.135***  | 1.138***  |
| control_covid                                    |           | 1.113***  | 1.114***  | 1.113***  |
| informed_covid                                   |           | 1.132***  | 1.134***  | 1.134***  |
| informed_cold                                    |           | 0.935*    | 0.936*    | 0.937*    |
| informed_unempl                                  |           | 0.946     | 0.942     | 0.946     |
| conspiracy_score                                 |           | 0.673***  | 0.672***  | 0.668***  |
| subj_est_cases_In                                |           | 1.084     | 1.084     | 1.085     |
| subj_est_death_I                                 |           | 1.047**   | 1.046**   | 1.048**   |
| mask_wearing                                     |           | 1.241***  | 1.244***  | 1.242***  |
| distancing                                       |           | 1.109***  | 1.109***  | 1.107***  |
| regional dummies                                 | NO        | YES, sig. | YES, sig. | YES, sig. |
| infected_y_pc                                    |           | 8.165     | 8.960     | 9.464     |
| deceased_y_pc                                    |           | 2.407     | 6.895     | 0.918     |
| PL_infected_yester~y                             |           | 1.000     | 1.000     | 1.000     |
| PL_deceased_yester~y                             |           | 0.998     | 0.998     | 0.998     |
| male#c.age                                       |           |           | 0.998     |           |
| interactions: political preference#education     | NO        | NO        | YES, n.s. | NO        |
| interactions: experimental vars#demographic vars | NO        | NO        | NO        | YES, n.s. |
| i_v_p_pays10_male                                |           |           |           | 0.617**   |
| i_v_p_pays70_male                                |           |           |           | 0.603**   |
| cut1                                             | 1.050     | 0.622     | 0.668     | 1.526     |
| cut2                                             | 4.220***  | 3.453*    | 3.719*    | 8.579**   |
| cut3                                             | 16.790*** | 18.362*** | 19.880*** | 46.187*** |
| N                                                | 3105      | 3105      | 3105      | 3105      |
| pseudo r2                                        | 0.080     | 0.185     | 0.186     | 0.189     |
| legend: * p<0.1; **p<0.05; *** p<0.01            |           |           |           |           |

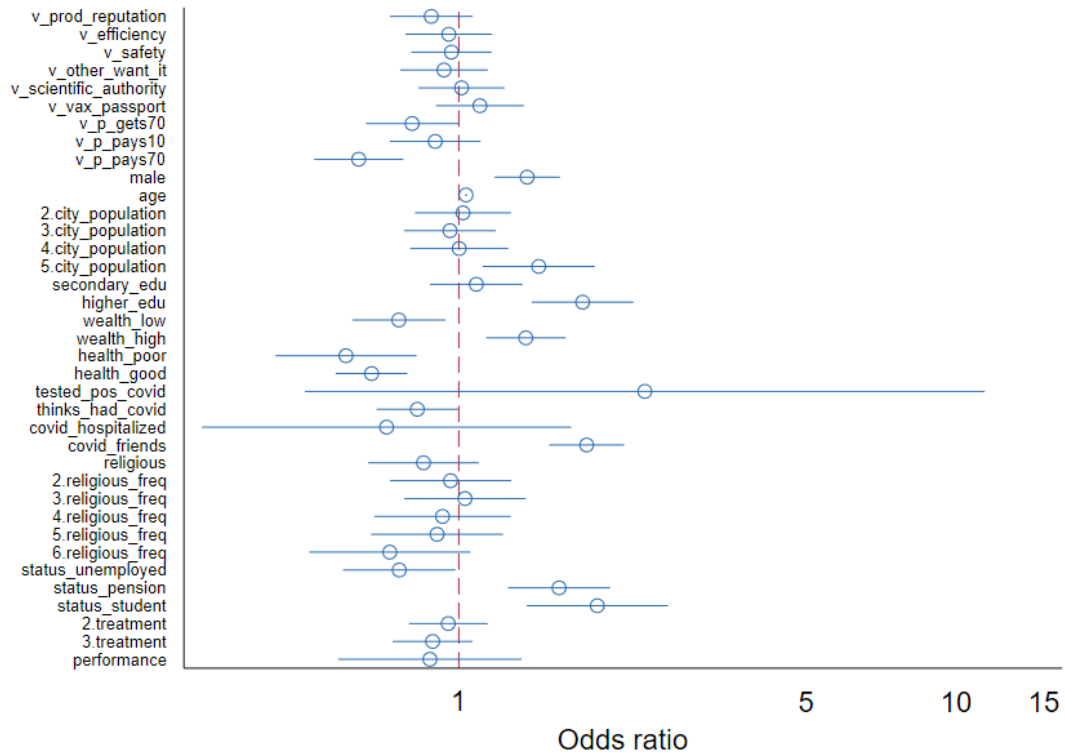

Figure S2.2: Visualization of odds ratio of logistic regression on vaccination decision (Wave 1), specification o\_1 with 95% CIs

Table S3.4: Ordered logistics model (Wave 1), specifications 5-8

| Variable             | o_5      | o_6      | o_7      | o_8      |
|----------------------|----------|----------|----------|----------|
| <b>v_decision</b>    |          |          |          |          |
| v_prod_reputation    | 0.814    | 0.912    | 0.654    | 0.863    |
| v_efficiency         | 0.477    | 0.902    | 0.887    | 0.903    |
| v_safety             | 0.641    | 0.960    | 1.184    | 1.002    |
| v_other_want_it      | 0.713    | 0.943    | 1.318    | 0.943    |
| v_scientific_autho~y | 0.877    | 1.066    | 1.391    | 1.065    |
| v_vax_passport       | 0.943    | 1.159    | 1.040    | 1.167    |
| v_p_gets70           | 1.237    | 0.833    | 1.633    | 0.880    |
| v_p_pays10           | 1.811    | 0.871    | 1.517    | 0.876    |
| v_p_pays70           | 0.768    | 0.484*** | 1.025    | 0.582*** |
| male                 | 1.433*** | 1.432*** | 1.430*** | 1.444*** |
| age                  | 1.019*** | 1.018*** | 1.018*** | 1.018*** |
| city small (<20k)    | 0.930    | 0.926    | 0.917    | 0.932    |
| city medium (20-99k) | 0.942    | 0.946    | 0.942    | 0.944    |
| city big (100-500k)  | 0.798*   | 0.803*   | 0.793*   | 0.813    |
| city large (>500k)   | 1.084    | 1.083    | 1.060    | 1.090    |
| secondary_edu        | 1.115    | 1.120    | 1.093    | 1.080    |
| higher_edu           | 1.557*** | 1.576*** | 1.547*** | 1.545*** |
| wealth_low           | 0.824    | 0.830    | 0.850    | 0.845    |

|                             |           |           |           |           |
|-----------------------------|-----------|-----------|-----------|-----------|
| wealth_high                 | 1.310***  | 1.018     | 1.320***  | 1.322***  |
| health_poor                 | 0.565***  | 0.554***  | 0.558***  | 0.570***  |
| health_good                 | 0.773***  | 0.777***  | 0.770***  | 0.772***  |
| tested_pos_covid            | 3.695     | 4.376     | 3.835     | 4.004     |
| thinks_had_covid            | 1.006     | 1.003     | 1.011     | 1.011     |
| covid_hospitalized          | 0.609     | 0.548     | 0.589     | 0.572     |
| covid_friends               | 1.368***  | 1.406***  | 1.409***  | 1.385***  |
| religious                   | 0.821     | 0.833     | 0.842     | 0.834     |
| relig:less than once a year | 0.953     | 0.978     | 0.967     | 0.974     |
| relig:few times a year      | 1.017     | 1.022     | 1.020     | 1.031     |
| relig:few times a month     | 1.001     | 1.021     | 0.997     | 1.008     |
| relig:few times a week      | 0.898     | 0.892     | 0.879     | 0.895     |
| relig:few times a day       | 0.609**   | 0.623**   | 0.624**   | 0.610**   |
| status_unemployed           | 0.924     | 0.904     | 0.897     | 0.905     |
| status_pension              | 1.365**   | 1.337**   | 1.323**   | 1.333**   |
| status_student              | 1.652**   | 1.660**   | 1.665**   | 1.658**   |
| treatment:cold              | 1.052     | 1.027     | 1.025     | 1.032     |
| treatment:unemployment      | 0.923     | 0.913     | 0.916     | 0.924     |
| performance                 | 1.286     | 1.260     | 1.294     | 1.277     |
| voting_short left           | 1.441**   | 1.477**   | 1.466**   | 1.866**   |
| right (ruling party)        | 0.529***  | 0.541***  | 0.538***  | 0.663*    |
| ultra-right                 | 0.223***  | 0.229***  | 0.224***  | 0.296***  |
| none or other               | 0.404***  | 0.410***  | 0.407***  | 0.490***  |
| e_happiness                 | 0.981     | 0.982     | 0.981     | 0.983     |
| e_fear                      | 0.994     | 0.996     | 0.996     | 0.996     |
| e_anger                     | 1.001     | 1.003     | 1.004     | 1.004     |
| e_disgust                   | 1.010     | 1.014     | 1.011     | 1.013     |
| e_sadness                   | 0.980     | 0.976     | 0.974     | 0.975     |
| e_surprise                  | 1.001     | 0.996     | 0.997     | 0.997     |
| risk_overall                | 0.990     | 0.992     | 0.991     | 0.992     |
| risk_work                   | 0.988     | 0.985     | 0.988     | 0.985     |
| risk_health                 | 1.028     | 1.027     | 1.027     | 1.025     |
| worry_covid                 | 1.139***  | 1.134***  | 1.138***  | 1.136***  |
| control_covid               | 1.113***  | 1.116***  | 1.117***  | 1.110***  |
| informed_covid              | 1.123***  | 1.131***  | 1.132***  | 1.131***  |
| informed_cold               | 0.940     | 0.935*    | 0.935*    | 0.937*    |
| informed_unempl             | 0.949     | 0.948     | 0.945     | 0.949     |
| conspiracy_score            | 0.669***  | 0.672***  | 0.756*    | 0.672***  |
| subj_est_cases_In           | 1.087     | 1.087     | 1.077     | 1.078     |
| subj_est_death_I            | 1.043**   | 1.046**   | 1.047**   | 1.049**   |
| mask_wearing                | 1.245***  | 1.238***  | 1.236***  | 1.244***  |
| distancing                  | 1.108***  | 1.111***  | 1.106***  | 1.109***  |
| regional dummies            | YES, sig. | YES, sig. | YES, sig. | YES, sig. |

|                                                       |           |           |           |           |
|-------------------------------------------------------|-----------|-----------|-----------|-----------|
| infected_y_pc                                         | 7.114     | 9.365     | 8.019     | 8.446     |
| deceased_y_pc                                         | 1.041     | 2.791     | 12.907    | 0.335     |
| PL_infected_yester~y                                  | 1.000     | 1.000     | 1.000     | 1.000     |
| PL_deceased_yester~y                                  | 0.998     | 0.998     | 0.998     | 0.998     |
| interaction between experimental vars                 | YES, n.s. | NO        | NO        | NO        |
| interaction: price#wealth                             | NO        | YES, n.s. | NO        | NO        |
| wp_v_p_pays70_weal~h                                  |           | 1.768**   |           |           |
| interaction: experimental vars#belief in              | NO        | NO        | YES, n.s. | NO        |
| conspiracy                                            |           |           |           |           |
| interaction: experimental vars # political preference | NO        | NO        | NO        | YES, n.s. |
| cut1                                                  | 0.441     | 0.571     | 1.044     | 0.739     |
| cut2                                                  | 2.471     | 3.182*    | 5.816*    | 4.124**   |
| cut3                                                  | 13.333*** | 16.996*** | 30.996*** | 22.079*** |
| N                                                     | 3105      | 3105      | 3105      | 3105      |
| pseudo r2                                             | 0.189     | 0.187     | 0.186     | 0.187     |
| legend: * p<0.1;**p<0.05; *** p<0.01                  |           |           |           |           |

Table S4.1: Logistic regression on vaccination decision (Wave 2), specifications 1-4

| Variable               | l_1      | l_2      | l_3      | l_4      |
|------------------------|----------|----------|----------|----------|
| v_prod_reputation      | 1.041    | 1.053    | 1.042    | 1.469    |
| v_efficiency           | 1.035    | 0.980    | 0.978    | 1.165    |
| v_safety               | 1.047    | 1.107    | 1.110    | 1.099    |
| v_other_want_it        | 1.039    | 0.902    | 0.902    | 0.809    |
| v_scientific_authority | 1.109    | 1.177    | 1.166    | 1.016    |
| v_vax_passport         | 1.008    | 0.941    | 0.941    | 1.365    |
| v_tested               | 1.172*   | 1.031    | 1.028    | 2.223**  |
| v_p_gets70             | 1.122    | 1.082    | 1.060    | 0.923    |
| v_p_pays10             | 0.997    | 1.009    | 1.005    | 0.819    |
| v_p_pays70             | 0.748**  | 0.670**  | 0.659**  | 0.934    |
| male                   | 1.482*** | 1.973*** | 1.507    | 1.613    |
| age                    | 1.044*** | 1.027*** | 1.025*** | 1.046*** |
| city_population        |          |          |          |          |
| small (<20k)           | 1.147    | 1.427*   | 1.435*   | 1.460**  |
| medium (20-99k)        | 1.283*   | 1.286    | 1.305    | 1.264    |
| big (100-500k)         | 1.296*   | 1.545*** | 1.570*** | 1.485**  |
| large (>500k)          | 1.151    | 1.000    | 1.026    | 0.994    |
| secondary_edu          | 1.283*   | 1.156    | 1.492    | 1.179    |
| higher_edu             | 1.549*** | 1.189    | 1.808*   | 1.080    |
| wealth_low             | 0.652*** | 0.817    | 0.822    | 0.788    |
| wealth_high            | 1.247*   | 1.230    | 1.213    | 1.232    |
| health_poor            | 0.798    | 0.651*   | 0.642*   | 0.636*   |
| health_good            | 0.641*** | 0.766*   | 0.771*   | 0.766*   |
| vaccine_extra_risky    | 0.503*** | 0.515*** | 0.515*** | 0.509*** |
| covid_extra_risky      | 1.472*** | 1.230    | 1.219    | 1.233    |
| health_smoking_light   | 0.789    | 0.759    | 0.713    | 0.813    |
| health_smoking_mod~e   | 0.988    | 0.993    | 0.969    | 1.086    |
| tested_pos_covid       | 3.382    | 8.499    | 9.329    | 7.632    |
| thinks_had_covid       | 0.837    | 1.090    | 1.096    | 1.089    |
| covid_hospitalized     | 0.555    | 0.324    | 0.310    | 0.339    |
| covid_friends          | 2.520*** | 1.774*** | 1.768*** | 1.816*** |
| religious              | 0.683**  | 0.542*** | 0.546*** | 0.508*** |
| religious_freq         |          |          |          |          |
| less than once a year  | 1.270    | 1.375    | 1.407    | 1.444*   |
| few times a year       | 1.217    | 1.276    | 1.296    | 1.327    |
| few times a month      | 1.507**  | 1.407    | 1.423    | 1.444    |
| few times a week       | 1.670*** | 1.649**  | 1.701**  | 1.750**  |
| few times a day        | 0.929    | 0.925    | 0.952    | 0.994    |
| status_unemployed      | 1.032    | 0.952    | 0.944    | 0.956    |
| status_pension         | 1.093    | 0.999    | 1.006    | 1.014    |
| status_student         | 1.695**  | 1.099    | 1.119    | 1.057    |
| voting_short           |          |          |          |          |
| left                   |          | 1.311    | 0.835    | 1.312    |
| right (ruling party)   |          | 0.915    | 1.530    | 0.935    |

|                                                  |    |           |           |           |
|--------------------------------------------------|----|-----------|-----------|-----------|
| ultra-right                                      |    | 0.428***  | 0.298     | 0.438***  |
| none or other                                    |    | 0.551***  | 0.822     | 0.550***  |
| e_happiness                                      |    | 0.955     | 0.956     | 0.954     |
| e_fear                                           |    | 0.956     | 0.953     | 0.950     |
| e_anger                                          |    | 0.997     | 0.994     | 0.998     |
| e_disgust                                        |    | 1.037     | 1.041     | 1.037     |
| e_sadness                                        |    | 1.027     | 1.031     | 1.026     |
| e_surprise                                       |    | 0.980     | 0.981     | 0.980     |
| risk_overall                                     |    | 0.966     | 0.968     | 0.967     |
| risk_work                                        |    | 1.029     | 1.028     | 1.030     |
| risk_health                                      |    | 1.012     | 1.013     | 1.012     |
| worry_covid                                      |    | 1.165***  | 1.165***  | 1.172***  |
| trust_EU_Y                                       |    | 1.900*    | 1.906*    | 2.047**   |
| trust_EU_N                                       |    | 0.835     | 0.837     | 0.819     |
| trust_gov_Y                                      |    | 0.669     | 0.677     | 0.646     |
| trust_gov_N                                      |    | 0.760*    | 0.753*    | 0.770     |
| trust_neigh_Y                                    |    | 0.828     | 0.837     | 0.780     |
| trust_neigh_N                                    |    | 1.218     | 1.222     | 1.238     |
| trust_doctors_Y                                  |    | 1.439*    | 1.423*    | 1.397     |
| trust_doctors_N                                  |    | 0.537***  | 0.534***  | 0.523***  |
| trust_media_Y                                    |    | 4.173***  | 4.102***  | 3.641**   |
| trust_media_N                                    |    | 0.913     | 0.920     | 0.920     |
| trust_family_Y                                   |    | 0.990     | 1.009     | 0.968     |
| trust_family_N                                   |    | 1.011     | 1.023     | 1.007     |
| trust_science_Y                                  |    | 1.718***  | 1.705***  | 1.831***  |
| trust_science_N                                  |    | 0.815     | 0.813     | 0.844     |
| control_covid                                    |    | 1.118***  | 1.122***  | 1.119***  |
| informed_covid                                   |    | 1.133***  | 1.138***  | 1.144***  |
| informed_cold                                    |    | 0.975     | 0.968     | 0.979     |
| informed_unempl                                  |    | 0.953     | 0.951     | 0.950     |
| conspiracy_score                                 |    | 0.708***  | 0.705***  | 0.701***  |
| subj_est_cases_In                                |    | 0.952     | 0.951     | 0.951     |
| subj_est_death_I                                 |    | 1.027     | 1.026     | 1.028     |
| mask_wearing                                     |    | 1.179**   | 1.162**   | 1.166**   |
| distancing                                       |    | 1.110***  | 1.110***  | 1.114***  |
| regional dummies                                 | NO | YES, sig. | YES, sig. | YES, sig. |
| infected_y_pc                                    |    | 0.827     | 0.808     | 0.846     |
| deceased_y_pc                                    |    | 182.399   | 752.182   | 57.031    |
| PL_infected_yester~y                             |    | 1.000     | 1.000     | 1.000     |
| PL_deceased_yester~y                             |    | 1.001     | 1.001     | 1.001     |
| male#c.age                                       |    |           | 1.006     |           |
| interactions: political preference#education     | NO | NO        | YES, n.s. | NO        |
| interactions: experimental vars#demographic vars | NO | NO        | NO        | YES, n.s. |

|                                                             |          |          |          |          |
|-------------------------------------------------------------|----------|----------|----------|----------|
| i_v_tested_age                                              |          |          |          | 0.985**  |
| i_v_p_gets70_male                                           |          |          |          | 2.416*** |
| _cons                                                       | 0.058*** | 0.140*** | 0.119*** | 0.062*** |
| <i>N</i>                                                    | 2814     | 2814     | 2814     | 2814     |
| pseudo r2                                                   | 0.143    | 0.348    | 0.350    | 0.357    |
| legend: odds ratios reported; * p<0.1; **p<0.05; *** p<0.01 |          |          |          |          |



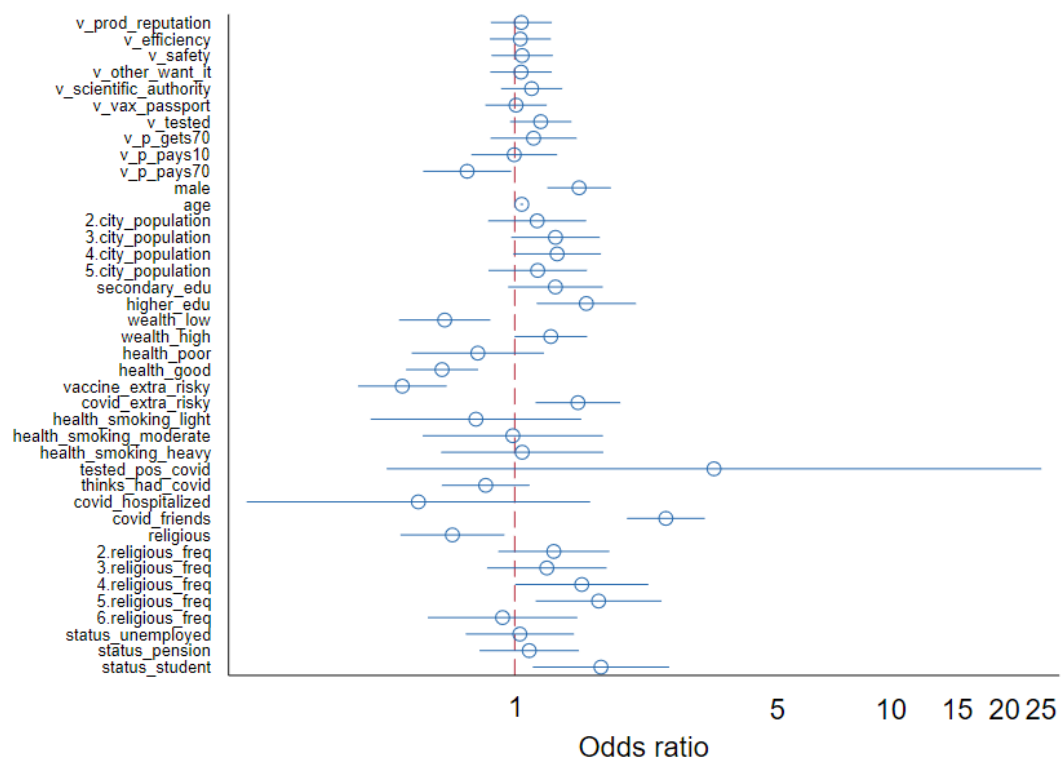

Figure S3.1: Visualization of odds ratio of logistic regression on vaccination decision (Wave 2), specification  $I\_1$  with 95% CIs

Table S4.2: Logistic regression on vaccination decision (Wave 2), specifications 5-9

| Variable               | I_5      | I_6      | I_7      | I_8      | I_9      |
|------------------------|----------|----------|----------|----------|----------|
| v_prod_reputation      | 1.448    | 1.051    | 0.328*** | 1.010    | 1.096    |
| v_efficiency           | 1.180    | 0.979    | 0.713    | 0.981    | 0.757    |
| v_safety               | 0.843    | 1.109    | 1.624    | 1.276    | 1.134    |
| v_other_want_it        | 1.024    | 0.916    | 1.098    | 0.875    | 1.060    |
| v_scientific_autho~y   | 0.828    | 1.179    | 1.404    | 1.204    | 1.081    |
| v_vax_passport         | 1.146    | 0.949    | 1.267    | 0.924    | 1.249    |
| v_scientific_authority | 0.610    | 1.033    | 0.722    | 1.050    | 1.495    |
| v_p_gets70             | 2.273*   | 1.073    | 0.469    | 1.064    | 1.084    |
| v_p_pays10             | 0.831    | 0.950    | 2.530    | 0.972    | 1.038    |
| v_p_pays70             | 0.454*   | 0.553*** | 0.589    | 0.647*** | 0.688**  |
| male                   | 1.998*** | 1.993*** | 1.975*** | 1.966*** | 1.999*** |
| age                    | 1.027*** | 1.028*** | 1.029*** | 1.027*** | 1.027*** |
| city small (<20k)      | 1.455**  | 1.415*   | 1.482**  | 1.385*   | 1.394*   |
| city medium (20-99k)   | 1.337*   | 1.281    | 1.284    | 1.266    | 1.252    |
| city big (100-500k)    | 1.584*** | 1.541*** | 1.591*** | 1.537**  | 1.551*** |
| city large (>500k)     | 1.006    | 0.991    | 0.988    | 0.964    | 0.967    |
| secondary_edu          | 1.189    | 1.157    | 1.157    | 1.165    | 1.175    |
| higher_edu             | 1.233    | 1.203    | 1.204    | 1.170    | 1.196    |

|                             |          |          |          |          |          |
|-----------------------------|----------|----------|----------|----------|----------|
| wealth_low                  | 0.827    | 0.720    | 0.796    | 0.816    | 0.814    |
| wealth_high                 | 1.225    | 1.055    | 1.221    | 1.248    | 1.215    |
| health_poor                 | 0.633*   | 0.653*   | 0.660    | 0.661    | 0.669    |
| health_good                 | 0.774*   | 0.762*   | 0.778*   | 0.753**  | 0.765*   |
| vaccine_extra_risky         | 0.492*** | 0.508*** | 0.519*** | 0.517*** | 0.513*** |
| covid_extra_risky           | 1.271    | 1.228    | 1.243    | 1.192    | 1.226    |
| health_smoking_light        | 0.723    | 0.763    | 0.775    | 0.734    | 0.802    |
| health_smoking_mod~e        | 0.984    | 0.995    | 1.021    | 0.992    | 1.046    |
| health_smoking_heavy        | 1.010    | 1.061    | 1.094    | 1.088    | 1.119    |
| tested_pos_covid            | 6.376    | 8.077    | 12.247*  | 8.307    | 8.136    |
| thinks_had_covid            | 1.118    | 1.095    | 1.119    | 1.083    | 1.098    |
| covid_hospitalized          | 0.380    | 0.330    | 0.265*   | 0.319    | 0.332    |
| covid_friends               | 1.783*** | 1.769*** | 1.774*** | 1.813*** | 1.789*** |
| religious                   | 0.545*** | 0.549*** | 0.546*** | 0.570*** | 0.525*** |
| relig:less than once a year | 1.365    | 1.354    | 1.361    | 1.265    | 1.437*   |
| relig:few times a year      | 1.211    | 1.248    | 1.274    | 1.215    | 1.312    |
| relig:few times a month     | 1.337    | 1.396    | 1.389    | 1.328    | 1.437    |
| relig:few times a week      | 1.583*   | 1.616**  | 1.677**  | 1.552*   | 1.722**  |
| relig:few times a day       | 0.878    | 0.916    | 0.913    | 0.847    | 0.915    |
| status_unemployed           | 0.943    | 0.972    | 0.964    | 0.983    | 0.982    |
| status_pension              | 1.032    | 0.999    | 0.994    | 0.984    | 1.029    |
| status_student              | 1.167    | 1.085    | 1.115    | 1.027    | 1.097    |
| voting_short                |          |          |          |          |          |
| left                        | 1.355    | 1.320    | 1.347    | 1.466    | 1.281    |
| right (ruling party)        | 0.921    | 0.909    | 0.964    | 1.230    | 0.914    |
| ultra-right                 | 0.421*** | 0.428*** | 0.426*** | 0.547    | 0.416*** |
| none or other               | 0.564*** | 0.545*** | 0.577*** | 0.509**  | 0.548*** |
| e_happiness                 | 0.950*   | 0.955    | 0.952*   | 0.957    | 0.953*   |
| e_fear                      | 0.955    | 0.957    | 0.959    | 0.958    | 0.96     |
| e_anger                     | 1.006    | 0.996    | 0.997    | 0.998    | 0.997    |
| e_disgust                   | 1.022    | 1.037    | 1.040    | 1.045    | 1.034    |
| e_sadness                   | 1.032    | 1.026    | 1.020    | 1.022    | 1.026    |
| e_surprise                  | 0.990    | 0.981    | 0.979    | 0.978    | 0.981    |
| risk_overall                | 0.959    | 0.966    | 0.968    | 0.963    | 0.968    |
| risk_work                   | 1.028    | 1.029    | 1.029    | 1.029    | 1.027    |
| risk_health                 | 1.013    | 1.012    | 1.015    | 1.014    | 1.014    |
| worry_covid                 | 1.165*** | 1.163*** | 1.166*** | 1.165*** | 1.163*** |
| trust_EU_Y                  | 1.987**  | 1.950**  | 1.901*   | 1.939*   | 1.935**  |
| trust_EU_N                  | 0.829    | 0.829    | 0.867    | 0.845    | 0.832    |
| trust_gov_Y                 | 0.636    | 0.673    | 0.614    | 0.667    | 0.669    |
| trust_gov_N                 | 0.728*   | 0.757*   | 0.780    | 0.739*   | 0.757*   |
| trust_neigh_Y               | 0.843    | 0.833    | 0.865    | 0.830    | 0.831    |
| trust_neigh_N               | 1.252    | 1.226    | 1.180    | 1.226    | 1.236    |

|                                                       |           |           |           |           |           |
|-------------------------------------------------------|-----------|-----------|-----------|-----------|-----------|
| trust_doctors_Y                                       | 1.361     | 1.467*    | 1.422*    | 1.444*    | 1.454*    |
| trust_doctors_N                                       | 0.559***  | 0.536***  | 0.549***  | 0.555***  | 0.536***  |
| trust_media_Y                                         | 5.014***  | 4.342***  | 4.352***  | 4.160***  | 3.864**   |
| trust_media_N                                         | 0.931     | 0.913     | 0.876     | 0.174***  | 0.928     |
| trust_family_Y                                        | 1.048     | 0.985     | 0.988     | 0.967     | 1.000     |
| trust_family_N                                        | 1.001     | 1.013     | 1.037     | 1.052     | 1.017     |
| trust_science_Y                                       | 1.761***  | 1.701***  | 1.773***  | 1.671***  | 1.724***  |
| trust_science_N                                       | 0.799     | 0.819     | 0.789     | 0.807     | 0.828     |
| control_covid                                         | 1.117***  | 1.118***  | 1.118***  | 1.123***  | 1.118***  |
| informed_covid                                        | 1.141***  | 1.141***  | 1.129***  | 1.136***  | 1.138***  |
| informed_cold                                         | 0.960     | 0.973     | 0.978     | 0.971     | 0.977     |
| informed_unempl                                       | 0.964     | 0.949     | 0.956     | 0.945     | 0.953     |
| conspiracy_score                                      | 0.696***  | 0.707***  | 0.631***  | 0.703***  | 0.704***  |
| subj_est_cases_In                                     | 0.955     | 0.955     | 0.961     | 0.956     | 0.947     |
| subj_est_death_I                                      | 1.021     | 1.026     | 1.032     | 1.029     | 1.028     |
| mask_wearing                                          | 1.184**   | 1.181**   | 1.191***  | 1.171**   | 1.180**   |
| distancing                                            | 1.113***  | 1.109***  | 1.108***  | 1.109***  | 1.114***  |
| regional dummies                                      | YES, sig. |
| infected_y_pc                                         | 0.828     | 0.828     | 0.787     | 0.838     | 0.797     |
| deceased_y_pc                                         | 35.555    | 213.322   | 547.450   | 185.755   | 326.051   |
| PL_infected_yester~y                                  | 1.000     | 1.000     | 1.000     | 1.000     | 1.000     |
| PL_deceased_yester~y                                  | 1.001     | 1.001     | 1.001     | 1.001     | 1.001     |
| interactions between experimental vars                | YES, n.s. | NO        | NO        | NO        | NO        |
| interaction: price#wealth                             | NO        | YES, n.s. | NO        | NO        | NO        |
| interaction: experimental vars#belief in conspiracy   | NO        | NO        | YES, n.s. | NO        | NO        |
| v_prod_reputat_con~y                                  |           |           | 1.282***  |           |           |
| interaction: experimental vars # political preference | NO        | NO        | NO        | YES, n.s. | YES, n.s. |
| _cons                                                 | 0.156**   | 0.146**   | 0.180*    | 0.132***  | 0.212*    |
| N                                                     | 2814      | 2814      | 2814      | 2814      | 2814      |
| pseudo r2                                             | 0.363     | 0.350     | 0.356     | 0.356     | 0.352     |

legend: odds ratios reported; \* p<0.1; \*\*p<0.05; \*\*\* p<0.01

Table S4.3: Ordered logistics model (Wave 2), specifications 1-4

| Variable              | o_1      | o_2      | o_3      | o_4      |
|-----------------------|----------|----------|----------|----------|
| <b>v_decision</b>     |          |          |          |          |
| v_prod_reputation     | 1.086    | 1.143    | 1.127    | 1.224    |
| v_efficiency          | 1.096    | 1.059    | 1.054    | 1.132    |
| v_safety              | 1.016    | 1.088    | 1.085    | 1.186    |
| v_other_want_it       | 1.137    | 1.023    | 1.018    | 0.711    |
| v_scientific_autho~y  | 1.021    | 1.038    | 1.031    | 1.188    |
| v_vax_passport        | 1.046    | 1.027    | 1.028    | 1.629    |
| v_tested              | 1.234*** | 1.069    | 1.075    | 1.551    |
| v_p_gets70            | 1.056    | 0.988    | 0.965    | 0.906    |
| v_p_pays10            | 0.982    | 0.911    | 0.903    | 0.782    |
| v_p_pays70            | 0.724*** | 0.628*** | 0.618*** | 0.840    |
| male                  | 1.413*** | 1.760*** | 1.233    | 1.855**  |
| age                   | 1.043*** | 1.024*** | 1.021*** | 1.032*** |
| city_population       |          |          |          |          |
| small (<20k)          | 1.122    | 1.335**  | 1.332**  | 1.370**  |
| medium (20-99k)       | 1.124    | 1.052    | 1.064    | 1.030    |
| big (100-500k)        | 1.203    | 1.294**  | 1.324**  | 1.257*   |
| large (>500k)         | 1.140    | 0.981    | 1.011    | 0.991    |
| secondary_edu         | 1.233*   | 1.118    | 1.630*   | 1.125    |
| higher_edu            | 1.560*** | 1.188    | 1.945**  | 1.264    |
| wealth_low            | 0.646*** | 0.856    | 0.860    | 0.866    |
| wealth_high           | 1.273**  | 1.247**  | 1.242**  | 1.244*   |
| health_poor           | 0.914    | 0.793    | 0.780    | 0.807    |
| health_good           | 0.712*** | 0.892    | 0.897    | 0.899    |
| vaccine_extra_risky   | 0.523*** | 0.597*** | 0.601*** | 0.599*** |
| covid_extra_risky     | 1.602*** | 1.409*** | 1.395*** | 1.410*** |
| health_smoking_light  | 0.845    | 0.911    | 0.851    | 0.945    |
| health_smoking_mod~e  | 1.048    | 1.040    | 1.015    | 1.103    |
| health_smoking_heav~y | 1.115    | 1.130    | 1.094    | 1.189    |
| thinks_had_covid      | 0.907    | 1.172    | 1.190    | 1.171    |
| covid_hospitalized    | 0.649    | 0.389*   | 0.379*   | 0.402*   |
| covid_friends         | 2.277*** | 1.515*** | 1.516*** | 1.536*** |
| religious             | 0.717**  | 0.638*** | 0.642*** | 0.614*** |
| religious_freq        |          |          |          |          |
| less than once a year | 1.202    | 1.323*   | 1.338*   | 1.331*   |
| few times a year      | 1.127    | 1.213    | 1.223    | 1.236    |
| few times a month     | 1.188    | 1.148    | 1.158    | 1.175    |
| few times a week      | 1.349*   | 1.350*   | 1.389*   | 1.382*   |
| few times a day       | 0.822    | 0.984    | 1.017    | 1.036    |
| status_unemployed     | 1.058    | 0.967    | 0.955    | 0.960    |
| status_pension        | 1.160    | 1.037    | 1.047    | 1.057    |
| status_student        | 1.978*** | 1.170    | 1.207    | 1.166    |
| voting_short          |          |          |          |          |

|                                                 |    |                |                  |                |
|-------------------------------------------------|----|----------------|------------------|----------------|
| left                                            |    | 1.112          | 1.001            | 1.118          |
| right (ruling party)                            |    | 0.785          | 1.325            | 0.795          |
| ultra-right                                     |    | 0.459***       | 0.353            | 0.471***       |
| none or other                                   |    | 0.567***       | 0.947            | 0.573***       |
| e_happiness                                     |    | 0.980          | 0.981            | 0.979          |
| e_fear                                          |    | 0.954*         | 0.951*           | 0.952*         |
| e_anger                                         |    | 0.983          | 0.981            | 0.980          |
| e_disgust                                       |    | 1.022          | 1.022            | 1.026          |
| e_sadness                                       |    | 1.033          | 1.039            | 1.029          |
| e_surprise                                      |    | 0.976          | 0.979            | 0.979          |
| risk_overall                                    |    | 0.959          | 0.961            | 0.955*         |
| risk_work                                       |    | 1.015          | 1.014            | 1.018          |
| risk_health                                     |    | 1.024          | 1.025            | 1.024          |
| worry_covid                                     |    | 1.183***       | 1.183***         | 1.184***       |
| trust_EU_Y                                      |    | 2.147***       | 2.135***         | 2.258***       |
| trust_EU_N                                      |    | 0.794**        | 0.795**          | 0.789**        |
| trust_gov_Y                                     |    | 0.585*         | 0.578*           | 0.606*         |
| trust_gov_N                                     |    | 0.932          | 0.916            | 0.944          |
| trust_neigh_Y                                   |    | 1.102          | 1.100            | 1.062          |
| trust_neigh_N                                   |    | 1.171          | 1.169            | 1.178          |
| trust_doctors_Y                                 |    | 1.387**        | 1.381**          | 1.338*         |
| trust_doctors_N                                 |    | 0.579***       | 0.576***         | 0.568***       |
| trust_media_Y                                   |    | 2.134          | 2.197            | 2.198          |
| trust_media_N                                   |    | 0.879          | 0.884            | 0.867          |
| trust_family_Y                                  |    | 0.861          | 0.875            | 0.857          |
| trust_family_N                                  |    | 0.936          | 0.939            | 0.960          |
| trust_science_Y                                 |    | 1.839***       | 1.836***         | 1.913***       |
| trust_science_N                                 |    | 0.805          | 0.810            | 0.829          |
| control_covid                                   |    | 1.099***       | 1.102***         | 1.100***       |
| informed_covid                                  |    | 1.059          | 1.061            | 1.067*         |
| informed_cold                                   |    | 0.977          | 0.972            | 0.976          |
| informed_unempl                                 |    | 0.968          | 0.968            | 0.965          |
| conspiracy_score                                |    | 0.702***       | 0.699***         | 0.698***       |
| subj_est_cases_ln                               |    | 0.961          | 0.965            | 0.954          |
| subj_est_death_l                                |    | 1.021          | 1.021            | 1.020          |
| mask_wearing                                    |    | 1.215***       | 1.198***         | 1.224***       |
| distancing                                      |    | 1.104***       | 1.104***         | 1.104***       |
| regional dummies                                | NO | YES, sig.      | YES, sig.        | YES, sig.      |
| infected_y_pc                                   |    | 0.950          | 0.919            | 0.982          |
| deceased_y_pc                                   |    | 238342.66<br>6 | 1123990.11<br>5* | 114008.66<br>1 |
| PL_infected_yester~y                            |    | 1.000          | 1.000            | 1.000          |
| PL_deceased_yester<br>~y                        |    | 1.000          | 1.000            | 1.000          |
| male#c.age                                      |    |                | 1.008            |                |
| interactions: political<br>preference#education | NO | NO             | YES, n.s.        | NO             |

|                              |           |           |           |                |
|------------------------------|-----------|-----------|-----------|----------------|
| interactions:                |           |           |           |                |
| experimental                 |           |           |           |                |
| vars#demographic             | NO        | NO        | NO        | YES, n.s.      |
| vars                         |           |           |           |                |
| i_v_vax_passport_m~          |           |           |           |                |
| e                            |           |           |           | 0.651**        |
| cut1                         | 4.320***  | 1.216     | 1.467     | 1.930          |
| cut2                         | 17.048*** | 7.948***  | 9.625***  | 12.771***      |
| cut3                         | 86.588*** | 68.142*** | 83.134*** | 112.167**<br>* |
| <i>N</i>                     | 2814      | 2814      | 2814      | 2814           |
| pseudo <i>r</i> <sup>2</sup> | 0.090     | 0.247     | 0.249     | 0.252          |

legend: \*  $p < 0.1$ ; \*\*  $p < 0.05$ ; \*\*\*  $p < 0.01$

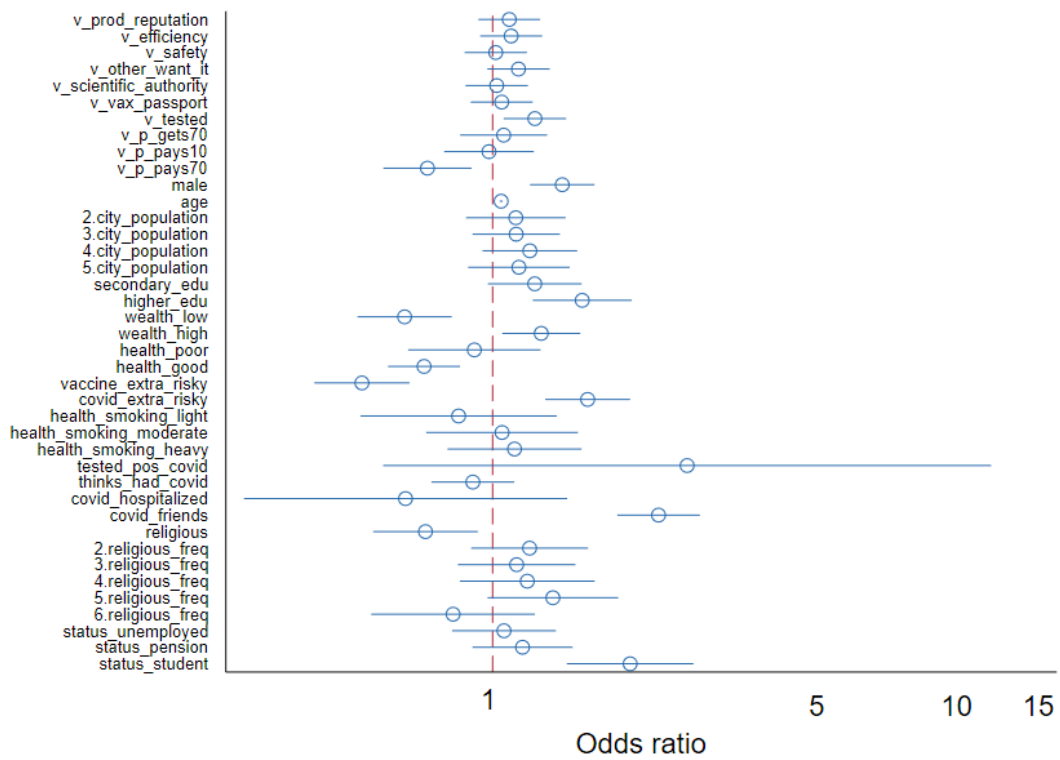

Figure S3.2: Visualization of odds ratio of logistic regression on vaccination decision (Wave 2), specification o\_1 with 95% CIs

Table S4.4: Ordered logistics model (Wave 2), specifications 5-9

| Variable                    | o_5      | o_6      | o_7      | o_8      | o_9      |
|-----------------------------|----------|----------|----------|----------|----------|
| <b>v_decision</b>           |          |          |          |          |          |
| v_prod_reputation           | 1.336    | 1.143    | 0.714    | 1.157    | 1.222    |
| v_efficiency                | 1.129    | 1.062    | 0.963    | 1.065    | 0.846    |
| v_safety                    | 0.701    | 1.086    | 1.293    | 1.135    | 1.150    |
| v_other_want_it             | 0.990    | 1.037    | 1.114    | 0.997    | 1.198    |
| v_scientific_autho~y        | 0.821    | 1.041    | 0.953    | 1.057    | 1.174    |
| v_vax_passport              | 1.780**  | 1.028    | 0.837    | 1.020    | 1.085    |
| v_tested                    | 0.818    | 1.074    | 0.787    | 1.074    | 1.165    |
| v_p_gets70                  | 1.001    | 0.906    | 0.706    | 0.979    | 0.982    |
| v_p_pays10                  | 0.825    | 0.966    | 1.326    | 0.892    | 0.908    |
| v_p_pays70                  | 0.452**  | 0.518*** | 0.662    | 0.616*** | 0.630*** |
| male                        | 1.735*** | 1.784*** | 1.757*** | 1.749*** | 1.781*** |
| age                         | 1.025*** | 1.024*** | 1.024*** | 1.024*** | 1.024*** |
| city small (<20k)           | 1.331**  | 1.328**  | 1.354**  | 1.311*   | 1.330**  |
| city medium (20-99k)        | 1.054    | 1.054    | 1.057    | 1.053    | 1.045    |
| city big (100-500k)         | 1.260*   | 1.298**  | 1.297**  | 1.294*   | 1.311**  |
| city large (>500k)          | 0.979    | 0.976    | 0.976    | 0.954    | 0.965    |
| secondary_edu               | 1.103    | 1.132    | 1.128    | 1.106    | 1.132    |
| higher_edu                  | 1.185    | 1.204    | 1.182    | 1.171    | 1.198    |
| wealth_low                  | 0.854    | 0.647*   | 0.857    | 0.861    | 0.850    |
| wealth_high                 | 1.247**  | 1.233    | 1.240**  | 1.256**  | 1.235*   |
| health_poor                 | 0.790    | 0.817    | 0.805    | 0.796    | 0.800    |
| health_good                 | 0.882    | 0.890    | 0.902    | 0.883    | 0.888    |
| vaccine_extra_risky         | 0.586*** | 0.585*** | 0.597*** | 0.600*** | 0.592*** |
| covid_extra_risky           | 1.424*** | 1.417*** | 1.419*** | 1.378*** | 1.406*** |
| health_smoking_light        | 0.946    | 0.927    | 0.911    | 0.935    | 0.962    |
| health_smoking_mod~e        | 1.060    | 1.045    | 1.050    | 1.058    | 1.076    |
| health_smoking_heav~y       | 1.139    | 1.152    | 1.139    | 1.169    | 1.172    |
| tested_pos_covid            | 6.293*   | 5.797*   | 7.291*   | 6.184*   | 6.592*   |
| thinks_had_covid            | 1.173    | 1.173    | 1.184    | 1.169    | 1.179    |
| covid_hospitalized          | 0.395*   | 0.408*   | 0.359*   | 0.383*   | 0.385*   |
| religious                   | 0.649*** | 0.641*** | 0.633*** | 0.662*** | 0.631*** |
| relig:less than once a year | 1.321*   | 1.295    | 1.325*   | 1.257    | 1.340*   |
| relig:few times a year      | 1.180    | 1.205    | 1.213    | 1.163    | 1.221    |
| relig:few times a month     | 1.114    | 1.145    | 1.150    | 1.097    | 1.154    |
| relig:few times a week      | 1.325    | 1.332    | 1.356*   | 1.287    | 1.372*   |
| relig:few times a day       | 0.933    | 0.973    | 0.988    | 0.928    | 0.976    |
| status_unemployed           | 0.967    | 0.965    | 0.975    | 0.999    | 0.987    |
| status_pension              | 1.043    | 1.037    | 1.052    | 1.028    | 1.047    |
| status_student              | 1.218    | 1.170    | 1.169    | 1.134    | 1.159    |
| voting_short left           | 1.141    | 1.130    | 1.104    | 1.184    | 1.106    |



|                                       |           |             |             |            |            |
|---------------------------------------|-----------|-------------|-------------|------------|------------|
| right (ruling party)                  | 0.783     | 0.792       | 0.785       | 1.015      | 0.795      |
| ultra-right                           | 0.459***  | 0.451***    | 0.455***    | 0.442**    | 0.454***   |
| none or other                         | 0.565***  | 0.565***    | 0.573***    | 0.542***   | 0.567***   |
| e_happiness                           | 0.979     | 0.982       | 0.977       | 0.981      | 0.980      |
| e_fear                                | 0.956*    | 0.954*      | 0.956*      | 0.955*     | 0.954*     |
| e_anger                               | 0.983     | 0.981       | 0.985       | 0.986      | 0.982      |
| e_disgust                             | 1.017     | 1.023       | 1.021       | 1.024      | 1.020      |
| e_sadness                             | 1.035     | 1.035       | 1.028       | 1.028      | 1.034      |
| e_surprise                            | 0.976     | 0.975       | 0.975       | 0.976      | 0.978      |
| risk_overall                          | 0.955*    | 0.960       | 0.960       | 0.957      | 0.959      |
| risk_work                             | 1.015     | 1.014       | 1.016       | 1.016      | 1.014      |
| risk_health                           | 1.025     | 1.023       | 1.026       | 1.024      | 1.025      |
| worry_covid                           | 1.181***  | 1.182***    | 1.185***    | 1.183***   | 1.182***   |
| trust_EU_Y                            | 2.156***  | 2.163***    | 2.128***    | 2.145***   | 2.190***   |
| trust_EU_N                            | 0.791**   | 0.794**     | 0.797**     | 0.794**    | 0.793**    |
| trust_gov_Y                           | 0.621*    | 0.581*      | 0.556**     | 0.583*     | 0.587*     |
| trust_gov_N                           | 0.929     | 0.925       | 0.940       | 0.921      | 0.929      |
| trust_neigh_Y                         | 1.094     | 1.111       | 1.112       | 1.121      | 1.094      |
| trust_neigh_N                         | 1.180     | 1.185       | 1.156       | 1.185      | 1.191      |
| trust_doctors_Y                       | 1.337*    | 1.389**     | 1.393**     | 1.404**    | 1.392**    |
| trust_doctors_N                       | 0.593***  | 0.582***    | 0.587***    | 0.584***   | 0.586***   |
| trust_media_Y                         | 2.309*    | 2.155       | 2.153       | 0.174***   | 2.095      |
| trust_media_N                         | 0.900     | 0.872       | 0.866       | 0.861      | 0.891      |
| trust_family_Y                        | 0.879     | 0.863       | 0.856       | 0.841*     | 0.867      |
| trust_family_N                        | 0.943     | 0.944       | 0.959       | 0.939      | 0.930      |
| trust_science_Y                       | 1.831***  | 1.827***    | 1.883***    | 1.829***   | 1.852***   |
| trust_science_N                       | 0.810     | 0.804       | 0.794*      | 0.808      | 0.807      |
| control_covid                         | 1.099***  | 1.098***    | 1.098***    | 1.098***   | 1.103***   |
| informed_covid                        | 1.061     | 1.063       | 1.053       | 1.057      | 1.058      |
| informed_cold                         | 0.975     | 0.975       | 0.980       | 0.975      | 0.978      |
| informed_unempl                       | 0.967     | 0.968       | 0.972       | 0.965      | 0.968      |
| conspiracy_score                      | 0.698***  | 0.701***    | 0.634***    | 0.702***   | 0.702***   |
| subj_est_cases_ln                     | 0.947     | 0.964       | 0.965       | 0.967      | 0.964      |
| subj_est_death_l                      | 1.017     | 1.021       | 1.023       | 1.023      | 1.020      |
| mask_wearing                          | 1.216***  | 1.217***    | 1.214***    | 1.212***   | 1.214***   |
| distancing                            | 1.108***  | 1.103***    | 1.104***    | 1.104***   | 1.106***   |
| regional dummies                      | YES, sig. | YES, sig.   | YES, sig.   | YES, sig.  | YES, sig.  |
| infected_y_pc                         | 0.992     | 0.946       | 0.929       | 0.975      | 0.947      |
| deceased_y_pc                         | 30285.575 | 423049.653* | 448809.409* | 209639.191 | 197672.969 |
| PL_infected_yester~y                  | 1.000     | 1.000       | 1.000       | 1.000      | 1.000      |
| PL_deceased_yester~y                  | 1.000     | 1.000       | 1.000       | 1.000      | 1.000      |
| interaction between experimental vars | YES, n.s. | NO          | NO          | NO         | NO         |
| interaction: price#wealth             | NO        | YES, n.s.   | NO          | NO         | NO         |

|                                       |      |           |           |           |           |           |
|---------------------------------------|------|-----------|-----------|-----------|-----------|-----------|
| interaction:                          |      |           |           |           |           |           |
| experimental                          |      |           |           |           |           |           |
| vars#belief                           | in   | NO        | NO        | YES, n.s. | NO        | NO        |
| conspiracy                            |      |           |           |           |           |           |
| interaction:                          |      |           |           |           |           |           |
| experimental                          | vars | #         | NO        | NO        | YES, n.s. | NO        |
| political preference                  |      |           |           |           |           |           |
| interactions:                         |      |           |           |           |           |           |
| experimental                          | var  | NO        | NO        | NO        | NO        | YES, n.s. |
| shown#shown as 1st                    |      |           |           |           |           |           |
| interactions:                         |      |           |           |           |           |           |
| experimental                          | var  | NO        | NO        | NO        | NO        | YES, n.s. |
| shown#order of vars                   |      |           |           |           |           |           |
| cut1                                  |      | 1.072     | 1.187     | 0.797     | 1.276     | 1.062     |
| cut2                                  |      | 7.157***  | 7.792***  | 5.262**   | 8.475***  | 6.985***  |
| cut3                                  |      | 62.839*** | 67.289*** | 45.407*** | 73.573*** | 60.331*** |
| <i>N</i>                              |      | 2814      | 2814      | 2814      | 2814      | 2814      |
| pseudo <i>r</i> <sup>2</sup>          |      | 0.253     | 0.249     | 0.249     | 0.251     | 0.249     |
| legend: * p<0.1; **p<0.05; *** p<0.01 |      |           |           |           |           |           |

Table S5.1 Summary statistics - demographic characteristics, Wave 1 and Wave 2

|                   | Wave 1 |        |        | Wave 2 |        |        |
|-------------------|--------|--------|--------|--------|--------|--------|
|                   | Mean   | Median | SD     | Mean   | Median | SD     |
| city_population   | 2.590  | 3      | 1.450  | 2.614  | 3      | 1.455  |
| male              | 0.483  | 0      | 0.500  | 0.482  | 0      | 0.500  |
| age               | 43.718 | 44     | 15.889 | 45.826 | 46     | 16.493 |
| elementary_edu    | 0.129  | 0      | 0.335  | 0.127  | 0      | 0.333  |
| secondary_edu     | 0.439  | 0      | 0.496  | 0.445  | 0      | 0.497  |
| higher_edu        | 0.432  | 0      | 0.495  | 0.429  | 0      | 0.495  |
| wealth_low        | 0.164  | 0      | 0.370  | 0.156  | 0      | 0.363  |
| wealth_high       | 0.285  | 0      | 0.451  | 0.296  | 0      | 0.456  |
| health_poor       | 0.077  | 0      | 0.266  | 0.079  | 0      | 0.269  |
| health_good       | 0.549  | 1      | 0.498  | 0.555  | 1      | 0.497  |
| religious_often   | 0.414  | 0      | 0.493  | 0.399  | 0      | 0.490  |
| status_unemployed | 0.103  | 0      | 0.304  | 0.106  | 0      | 0.308  |
| status_pension    | 0.211  | 0      | 0.408  | 0.232  | 0      | 0.422  |
| status_student    | 0.062  | 0      | 0.242  | 0.069  | 0      | 0.253  |

#### SI References

1. J. R. Landis, G. G. Koch, An application of hierarchical kappa-type statistics in the assessment of majority agreement among multiple observers. *Biometrics*, 363–374 (1977).
